# Supplementary material for: Radiotherapy improves serum fatty acids and lipid profile in breast cancer
Source: PubMed Central journal article supplement (PMC5437547; doi:10.1186/s12944-017-0481-y), 2017-05-18
Supplement: 12944_2017_481_MOESM1_ESM.pdf [file 12944_2017_481_MOESM1_ESM.pdf]

Post Free Fatty acid

| Name of p: | C-12:0 | C - 14: 0 | C-15:0 | C - 16 : 0 | C - 18 : 0 | Total SFA | C 14:1 | C - 16 : 1 |
|------------|--------|-----------|--------|------------|------------|-----------|--------|------------|
| Post 1     | 0      | 0         | 0      | 26.34      | 18.9       | 45.24     | 0      | 2.3        |
| Post 2     | 0      | 0         | 0      | 25.1       | 17.5       | 42.6      | 0      | 1.9        |
| Post 3     | 0      | 0         | 0      | 28.7       | 15.5       | 44.2      | 0      | 2.1        |
| Post 4     | 0      | 0         | 0      | 31.9       | 13.7       | 46        | 0      | 3.4        |
| Post 5     | 0      | 0         | 0      | 31.8       | 15.8       | 47.6      | 0      | 4.2        |
| Post 6     | 0      | 0         | 0      | 26.5       | 14.2       | 40.7      | 0      | 3.3        |
| Post 7     | 0      | 0         | 0      | 28.9       | 13.3       | 42.2      | 0      | 3.1        |
| Post 8     | 0      | 0         | 0      | 25.5       | 17.2       | 42.7      | 0      | 2.6        |
| Post 9     | 0      | 0         | 0      | 30.1       | 14.7       | 44.8      | 0      | 1.9        |
| Post 10    | 0      | 0         | 0      | 29.34      | 15         | 44.34     | 0      | 2.2        |
| Post 11    | 0      | 0.33      | 0      | 27.98      | 16.1       | 44.08     | 0.03   | 1.76       |
| post 12    | 0      | 1.2       | 0      | 24.54      | 18.34      | 42.88     | 0      | 4.5        |
| post 13    | 0      | 0.91      | 0      | 30.35      | 16.87      | 47.22     | 0      | 1.4        |
| post 14    | 0      | 0         | 0      | 26.34      | 18.9       | 45.24     | 0      | 2.3        |
| post 15    | 0      | 0         | 0      | 25.1       | 17.5       | 42.6      | 0      | 1.9        |
| post 16    | 0      | 0         | 0      | 28.7       | 15.5       | 44.2      | 0      | 2.1        |
| post 17    | 0      | 0         | 0      | 31.9       | 13.7       | 46        | 0      | 3.4        |
| post 18    | 0      | 0         | 0      | 31.8       | 15.8       | 47.6      | 0      | 4.2        |
| post 19    | 0      | 0         | 0      | 26.5       | 14.2       | 40.7      | 0      | 2.2        |
| post 20    | 0      | 0         | 0      | 28.9       | 13.3       | 42.2      | 0.05   | 1.75       |
| post 21    | 0      | 0         | 0      | 25.5       | 17.2       | 42.7      | 0      | 4.5        |
| post 22    | 0      | 0         | 0      | 30.1       | 14.7       | 44.8      | 0      | 1.4        |
| post 23    | 0      | 0         | 0      | 29.34      | 15         | 44.34     | 0      | 2.1        |
| post 24    | 0      | 0         | 0      | 27.98      | 16.1       | 44.08     | 0      | 3.4        |
| post 25    | 0      | 0         | 0      | 24.54      | 18.34      | 42.88     | 0      | 4.2        |
| post 26    | 0      | 0         | 0      | 30.35      | 16.87      | 47.22     | 0      | 3.3        |
| post 27    | 0      | 0         | 0      | 25.5       | 17.2       | 42.7      | 0      | 3.1        |
| post 28    | 0      | 0         | 0      | 30.1       | 14.7       | 44.8      | 0      | 2.6        |
| post 29    | 0      | 0         | 0      | 29.34      | 15         | 44.34     | 0      | 1.9        |
| post 30    | 0      | 0         | 0      | 31.9       | 13.7       | 46        | 0.04   | 1.77       |
| Mean       | 0      | 0.813333  | 0      | 28.23462   | 15.93154   | 44.19692  | 0.04   | 2.666154   |
| Stdev      | 0      | 0.442982  | 0      | 2.476559   | 1.757877   | 2.004127  | 0.01   | 0.962579   |

| C - 18 : 1 | MUFA | C - 18 : 2 | C - 18 : 3 | c-20:2 | C - 20 : 4 | C - 22:6 | PUFA  | C18:0/C18:1 |
|------------|------|------------|------------|--------|------------|----------|-------|-------------|
| 26.2       | 28.5 | 20         | 0.9        | 0      | 4.6        | 5.9      | 31.4  | 0.72137405  |
| 27.6       | 29.5 | 21.3       | 0          | 0      | 4.8        | 2.3      | 28.4  | 0.63405797  |
| 29.6       | 31.7 | 22.5       | 0          | 0      | 3.5        | 1.8      | 27.8  | 0.52364865  |
| 24.8       | 28.2 | 19.9       | 0          | 2.6    | 2.6        | 2.8      | 27.9  | 0.55241935  |
| 26.9       | 31.1 | 18.6       | 0          | 0      | 3.8        | 2.9      | 25.3  | 0.58736059  |
| 24.2       | 27.5 | 23.5       | 0          | 0      | 1.6        | 0.9      | 26    | 0.58677686  |
| 27         | 30.1 | 19.3       | 0          | 0      | 2.6        | 3.6      | 25.5  | 0.49259259  |
| 24.3       | 26.9 | 18.5       | 0          | 1.01   | 4.9        | 0        | 24.41 | 0.70781893  |
| 28.3       | 30.2 | 17.4       | 0          | 3.9    | 2.4        | 0        | 23.7  | 0.51943463  |
| 26.3       | 28.5 | 15.3       | 0.2        | 2.8    | 1.7        | 0.6      | 20.6  | 0.57034221  |
| 28.3       | 30.1 | 17.6       | 0          | 0      | 0.67       | 0.45     | 18.72 | 0.56890459  |
| 22.7       | 27.2 | 22         | 0          | 0      | 2          | 0        | 24    | 0.80792952  |
| 28.4       | 29.8 | 22.1       | 0          | 0      | 0          | 2        | 24.1  | 0.59401408  |
| 26.2       | 28.5 | 20         | 0.9        | 0      | 4.6        | 5.9      | 31.4  | 0.72137405  |
| 27.6       | 29.5 | 21.3       | 0          | 0      | 4.8        | 2.3      | 28.4  | 0.63405797  |
| 29.6       | 31.7 | 22.5       | 0          | 0      | 3.5        | 1.8      | 27.8  | 0.52364865  |
| 24.8       | 28.2 | 19.9       | 0          | 2.6    | 2.6        | 2.8      | 27.9  | 0.55241935  |
| 26.9       | 31.1 | 18.6       | 0          | 0      | 3.8        | 2.9      | 25.3  | 0.58736059  |
| 26.3       | 28.5 | 15.3       | 0.2        | 2.8    | 1.7        | 0.6      | 20.6  | 0.53992395  |
| 28.3       | 30.1 | 17.6       | 0          | 0      | 0.67       | 0.45     | 18.72 | 0.46996466  |
| 22.7       | 27.2 | 22         | 0          | 0      | 2          | 0        | 24    | 0.75770925  |
| 28.4       | 29.8 | 22.1       | 0          | 0      | 0          | 2        | 24.1  | 0.51760563  |
| 29.6       | 31.7 | 23.5       | 0          | 0      | 1.6        | 0.9      | 26    | 0.50675676  |
| 24.8       | 28.2 | 19.3       | 0          | 0      | 2.6        | 3.6      | 25.5  | 0.64919355  |
| 26.9       | 31.1 | 18.5       | 0          | 1.01   | 4.9        | 0        | 24.41 | 0.68178439  |
| 24.2       | 27.5 | 17.4       | 0          | 3.9    | 2.4        | 0        | 23.7  | 0.69710744  |
| 27         | 30.1 | 17.6       | 0          | 0      | 0.67       | 0.45     | 18.72 | 0.63703704  |
| 24.3       | 26.9 | 22         | 0          | 0      | 2          | 0        | 24    | 0.60493827  |
| 28.3       | 30.2 | 22.1       | 0          | 0      | 0          | 2        | 24.1  | 0.53003534  |
| 28.3       | 30.1 | 20         | 0.9        | 0      | 4.6        | 5.9      | 31.4  | 0.48409894  |

|          |          |          |          |          |          |          |          |            |
|----------|----------|----------|----------|----------|----------|----------|----------|------------|
| 26.50769 | 29.17692 | 19.84615 | 0.666667 | 2.503333 | 2.705385 | 1.788462 | 25.21769 | 0.60512877 |
| 2.018853 | 1.502306 | 2.37368  | 0.404145 | 1.447423 | 1.5527   | 1.740229 | 3.318389 | 0.09071327 |

| n3/n6    | c18:2/C18: | C18:3/C18:1 | sat/unsat |
|----------|------------|-------------|-----------|
| 5.795    | 0.763359   | 0.034351145 | 32.98737  |
| 4.907981 | 0.771739   | 0           | 29.84407  |
| 3.58     | 0.760135   | 0           | 29.19432  |
| 5.340704 | 0.802419   | 0           | 29.53121  |
| 3.955914 | 0.69145    | 0           | 26.83055  |
| 1.638298 | 0.971074   | 0           | 27.48     |
| 2.786528 | 0.714815   | 0           | 26.90199  |
| 5.91     | 0.761317   | 0           | 25.99736  |
| 6.3      | 0.614841   | 0           | 25.18344  |
| 4.739216 | 0.581749   | 0.007604563 | 22.15579  |
| 0.695568 | 0.621908   | 0           | 20.18445  |
| 2        | 0.969163   | 0           | 25.57647  |
| 0.090498 | 0.778169   | 0           | 25.68456  |
| 5.795    | 0.763359   | 0.034351145 | 32.98737  |
| 4.907981 | 0.771739   | 0           | 29.84407  |
| 3.58     | 0.760135   | 0           | 29.19432  |
| 5.340704 | 0.802419   | 0           | 29.53121  |
| 3.955914 | 0.69145    | 0           | 26.83055  |
| 4.739216 | 0.581749   | 0.007604563 | 22.02807  |
| 0.695568 | 0.621908   | 0           | 20.12199  |
| 2        | 0.969163   | 0           | 25.56985  |
| 0.090498 | 0.778169   | 0           | 25.60336  |
| 1.638298 | 0.793919   | 0           | 27.39874  |
| 2.786528 | 0.778226   | 0           | 27.06312  |
| 5.91     | 0.687732   | 0           | 25.78878  |
| 6.3      | 0.719008   | 0           | 25.41709  |
| 0.695568 | 0.651852   | 0           | 20.1386   |
| 2        | 0.90535    | 0           | 25.66543  |
| 0.090498 | 0.780919   | 0           | 25.56821  |
| 5.795    | 0.706714   | 0.03180212  | 32.92824  |
| 3.672285 | 0.754011   | 0.008123    | 26.64102  |
| 2.068902 | 0.118593   | 0.002       | 3.478717  |
