# Supplementary material for: Radiotherapy improves serum fatty acids and lipid profile in breast cancer
Source: PubMed Central journal article supplement (PMC5437547; doi:10.1186/s12944-017-0481-y), 2017-05-18
Supplement: 12944_2017_481_MOESM2_ESM.pdf [file 12944_2017_481_MOESM2_ESM.pdf]

Post total

| Name of post | C-12:0   | C - 14: 0 | C-15:0   | C - 16 : 0 | C - 18 : 0 | Total SFA | C 14:1   | C - 16 : 1 |
|--------------|----------|-----------|----------|------------|------------|-----------|----------|------------|
| post 1       | 0        | 3.36      | 3.36     | 18.2       | 22.7       | 47.62     | 0        | 0          |
| post 2       | 0        | 2.65      | 2.01     | 23         | 23         | 50.66     | 0        | 0          |
| post 3       | 0        | 0         | 0        | 22.34      | 21.54      | 43.88     | 0        | 1.12       |
| post 4       | 0.4      | 3.592     | 3.59     | 14.27      | 25.35      | 47.202    | 1.04     | 1.25       |
| post 5       | 0        | 0         | 0        | 18.31      | 25.7       | 44.01     | 0.55     | 2.4        |
| post 6       | 0        | 0         | 0        | 24.3       | 22.4       | 46.7      | 0.87     | 1.15       |
| post 7       | 0        | 1.15      | 1.5      | 19.4       | 25.5       | 47.55     | 0        | 2.4        |
| post 8       | 0.42     | 0         | 0        | 22.03      | 17.21      | 39.66     | 0        | 1.05       |
| post 9       | 0.4      | 0         | 0        | 24.32      | 22.01      | 46.73     | 0.86     | 1.11       |
| post 10      | 0.5      | 1.25      | 1.25     | 22.68      | 23.67      | 49.35     | 0.55     | 1.01       |
| post 11      | 0.4      | 1.42      | 1.1      | 19.73      | 26.12      | 48.77     | 0.3      | 2          |
| post 12      | 0        | 1.5       | 0.2      | 20.12      | 22.21      | 44.03     | 1.9      | 2.3        |
| post 13      | 0        | 1         | 0.8      | 20.8       | 20.6       | 43.2      | 0.8      | 1.6        |
| post 14      | 0        | 0         | 0        | 24.3       | 22.4       | 46.7      | 0.87     | 1.15       |
| post 15      | 0        | 1.15      | 1.5      | 19.4       | 25.5       | 47.55     | 0        | 2.4        |
| post 16      | 0.42     | 0         | 0        | 22.03      | 17.21      | 39.66     | 0        | 1.05       |
| post 17      | 0.4      | 0         | 0        | 24.32      | 22.01      | 46.73     | 0.86     | 1.11       |
| post 18      | 0        | 3.36      | 3.36     | 18.2       | 22.7       | 47.62     | 0        | 0          |
| post 19      | 0        | 2.65      | 2.01     | 23         | 23         | 50.66     | 0        | 0          |
| post 20      | 0        | 0         | 0        | 22.34      | 21.54      | 43.88     | 0        | 1.12       |
| post 21      | 0.4      | 3.592     | 3.59     | 14.27      | 25.35      | 47.202    | 1.04     | 1.25       |
| post 22      | 0        | 0         | 0        | 18.31      | 25.7       | 44.01     | 0.55     | 2.4        |
| post 23      | 0.5      | 1.25      | 1.25     | 22.68      | 23.67      | 49.35     | 0.55     | 1.01       |
| post 24      | 0.4      | 1.42      | 1.1      | 19.73      | 26.12      | 48.77     | 0.3      | 2          |
| post 25      | 0        | 1.5       | 0.2      | 20.12      | 22.21      | 44.03     | 1.9      | 2.3        |
| post 26      | 0        | 1         | 0.8      | 20.8       | 20.6       | 43.2      | 0.8      | 1.6        |
| post 27      | 0.4      | 3.592     | 3.59     | 14.27      | 25.35      | 47.202    | 1.04     | 1.25       |
| post 28      | 0        | 0         | 0        | 18.31      | 25.7       | 44.01     | 0.55     | 2.4        |
| post 29      | 0        | 0         | 0        | 24.3       | 22.4       | 46.7      | 0.87     | 1.15       |
| post 30      | 0        | 1.15      | 1.5      | 19.4       | 25.5       | 47.55     | 0        | 2.4        |
| Mean         | 0.424    | 2.0342    | 1.867    | 20.73077   | 22.92385   | 46.10477  | 0.86     | 1.337692   |
| Stdev        | 0.040879 | 1.060894  | 1.183357 | 2.828505   | 2.460357   | 3.004634  | 0.424735 | 0.795908   |

Fatty acid

| C - 18 : 1 | MUFA     | C - 18 : 2 | C - 18 : 3 | c-20:2   | C - 20 : 4 | C - 22:6 | PUFA     | C18:0/C18: |
|------------|----------|------------|------------|----------|------------|----------|----------|------------|
| 20.54      | 20.54    | 24.42      | 7.42       | 0        | 0          | 0        | 31.84    | 1.105161   |
| 20.78      | 20.78    | 19.5       | 3.43       | 2.2      | 3.43       | 0        | 28.56    | 1.106833   |
| 25.32      | 26.44    | 23.01      | 2.15       | 0        | 1.8        | 2.7      | 29.66    | 0.850711   |
| 26.78      | 29.07    | 20.08      | 3.05       | 0.34     | 0.11       | 0.12     | 23.7     | 0.946602   |
| 27         | 29.95    | 23.21      | 3.14       | 1.9      | 1.7        | 0        | 29.95    | 0.951852   |
| 25.98      | 28       | 20.12      | 2.16       | 0        | 1.34       | 0.38     | 24       | 0.862202   |
| 24.62      | 27.02    | 21.41      | 0          | 0        | 1.9        | 1.12     | 24.43    | 1.035743   |
| 27.05      | 28.1     | 27.04      | 0          | 0        | 3          | 2.2      | 32.24    | 0.636229   |
| 24.86      | 26.83    | 24.05      | 1.03       | 0.65     | 0.71       | 0        | 26.44    | 0.885358   |
| 26.32      | 27.88    | 18.73      | 1.27       | 1.2      | 1.57       | 0        | 22.77    | 0.899316   |
| 24.3       | 26.6     | 19.4       | 3.2        | 1.9      | 1.9        | 0.2      | 26.6     | 1.074897   |
| 20.77      | 24.97    | 24.3       | 2.8        | 1.5      | 0.9        | 1.5      | 31       | 1.069331   |
| 26         | 28.4     | 22.3       | 1.1        | 0.9      | 2.3        | 1.8      | 28.4     | 0.792308   |
| 25.98      | 28       | 20.12      | 2.16       | 0        | 1.34       | 0.38     | 24       | 0.862202   |
| 24.62      | 27.02    | 21.41      | 0          | 0        | 1.9        | 1.12     | 24.43    | 1.035743   |
| 27.05      | 28.1     | 27.04      | 0          | 0        | 3          | 2.2      | 32.24    | 0.636229   |
| 24.86      | 26.83    | 24.05      | 1.03       | 0.65     | 0.71       | 0        | 26.44    | 0.885358   |
| 20.54      | 20.54    | 24.42      | 7.42       | 0        | 0          | 0        | 31.84    | 1.105161   |
| 20.78      | 20.78    | 19.5       | 3.43       | 2.2      | 3.43       | 0        | 28.56    | 1.106833   |
| 25.32      | 26.44    | 23.01      | 2.15       | 0        | 1.8        | 2.7      | 29.66    | 0.850711   |
| 26.78      | 29.07    | 20.08      | 3.05       | 0.34     | 0.11       | 0.12     | 23.7     | 0.946602   |
| 27         | 29.95    | 23.21      | 3.14       | 1.9      | 1.7        | 0        | 29.95    | 0.951852   |
| 26.32      | 27.88    | 18.73      | 1.27       | 1.2      | 1.57       | 0        | 22.77    | 0.899316   |
| 24.3       | 26.6     | 19.4       | 3.2        | 1.9      | 1.9        | 0.2      | 26.6     | 1.074897   |
| 20.77      | 24.97    | 24.3       | 2.8        | 1.5      | 0.9        | 1.5      | 31       | 1.069331   |
| 26         | 28.4     | 22.3       | 1.1        | 0.9      | 2.3        | 1.8      | 28.4     | 0.792308   |
| 26.78      | 29.07    | 20.08      | 3.05       | 0.34     | 0.11       | 0.12     | 23.7     | 0.946602   |
| 27         | 29.95    | 23.21      | 3.14       | 1.9      | 1.7        | 0        | 29.95    | 0.951852   |
| 25.98      | 28       | 20.12      | 2.16       | 0        | 1.34       | 0.38     | 24       | 0.862202   |
| 24.62      | 27.02    | 21.41      | 0          | 0        | 1.9        | 1.12     | 24.43    | 1.035743   |
| 24.64      | 26.50615 | 22.12077   | 2.365385   | 1.344    | 1.589231   | 1.152    | 27.66077 | 0.939734   |
| 2.410709   | 2.883937 | 2.490095   | 1.925697   | 0.690993 | 0.960066   | 0.894487 | 3.243459 | 0.139087   |

| n3/n6    | c18:2/C18: | C18:3/C18:1 | sat/unsat |
|----------|------------|-------------|-----------|
| 7.42     | 1.1889     | 0.36124635  | 34.1584   |
| 9.06     | 0.938402   | 0.16506256  | 30.99792  |
| 4.06734  | 0.908768   | 0.08491311  | 31.31961  |
| 3.505976 | 0.749813   | 0.11389096  | 25.32374  |
| 6.74     | 0.85963    | 0.1162963   | 31.41945  |
| 3.518887 | 0.774442   | 0.08314088  | 25.66786  |
| 1.952312 | 0.869618   | 0           | 26.18981  |
| 3.081361 | 0.99963    | 0           | 33.65139  |
| 2.39     | 0.967418   | 0.04143202  | 28.18171  |
| 4.04     | 0.711626   | 0.04825228  | 24.54009  |
| 7.010309 | 0.798354   | 0.13168724  | 28.43346  |
| 5.261728 | 1.169957   | 0.13480982  | 32.76332  |
| 4.380717 | 0.857692   | 0.04230769  | 29.92113  |
| 3.518887 | 0.774442   | 0.08314088  | 25.66786  |
| 1.952312 | 0.869618   | 0           | 26.18981  |
| 3.081361 | 0.99963    | 0           | 33.65139  |
| 2.39     | 0.967418   | 0.04143202  | 28.18171  |
| 7.42     | 1.1889     | 0.36124635  | 34.1584   |
| 9.06     | 0.938402   | 0.16506256  | 30.99792  |
| 4.06734  | 0.908768   | 0.08491311  | 31.31961  |
| 3.505976 | 0.749813   | 0.11389096  | 25.32374  |
| 6.74     | 0.85963    | 0.1162963   | 31.41945  |
| 4.04     | 0.711626   | 0.04825228  | 24.54009  |
| 7.010309 | 0.798354   | 0.13168724  | 28.43346  |
| 5.261728 | 1.169957   | 0.13480982  | 32.76332  |
| 4.380717 | 0.857692   | 0.04230769  | 29.92113  |
| 3.505976 | 0.749813   | 0.11389096  | 25.32374  |
| 6.74     | 0.85963    | 0.1162963   | 31.41945  |
| 3.518887 | 0.774442   | 0.08314088  | 25.66786  |
| 1.952312 | 0.869618   | 0           | 26.18981  |
| 4.802202 | 0.90725    | 0.10177225  | 29.12455  |
| 2.147698 | 0.147241   | 0.09357019  | 3.225224  |
