# Supplementary material for: Radiotherapy improves serum fatty acids and lipid profile in breast cancer
Source: PubMed Central journal article supplement (PMC5437547; doi:10.1186/s12944-017-0481-y), 2017-05-18
Supplement: 12944_2017_481_MOESM3_ESM.pdf [file 12944_2017_481_MOESM3_ESM.pdf]

## Pre Free Fatty acid

|        | C-14:0  | C-15:0   | C - 16 : 0 | C - 18 : 0 | Total SFA | C 14:1   | C - 16 : 1 | C - 18 : 1 |
|--------|---------|----------|------------|------------|-----------|----------|------------|------------|
| Pre 1  |         |          |            |            |           |          |            |            |
| Pre 2  | 1.5     | 0        | 23.58      | 21.95      | 47.03     | 2.01     | 1.36       | 26.32      |
| Pre 3  | 1.3     | 0        | 21.33      | 24.36      | 46.99     | 1.8      | 2.1        | 28.02      |
| Pre 4  | 1.8     | 0.3      | 25.2       | 20.9       | 48.2      | 1.3      | 1.8        | 29.3       |
| Pre 5  | 1.2     | 0.2      | 25.9       | 19.8       | 47.1      | 2.5      | 1.2        | 27.9       |
| Pre 6  | 0.9     | 0.5      | 20.1       | 22.4       | 43.9      | 1.2      | 1.23       | 26.9       |
| Pre 7  | 1.56    | 0        | 21.2       | 24.5       | 47.26     | 1.87     | 1.65       | 27.32      |
| Pre 8  | 1.42    | 0.33     | 24.36      | 19.9       | 46.01     | 1.31     | 2.8        | 23.34      |
| Pre 9  | 1.63    | 0        | 20.2       | 23.5       | 45.33     | 2.1      | 1.45       | 29.52      |
| Pre 10 | 1.24    | 0.85     | 25.68      | 18.72      | 46.49     | 2.4      | 1.85       | 27.52      |
| Pre 11 | 0.98    | 0.82     | 18.32      | 21.36      | 41.48     | 1.31     | 2          | 25.98      |
| Pre 12 | 0.87    | 0.45     | 20.54      | 21.32      | 43.18     | 1.85     | 2.13       | 26.3       |
| Pre 13 | 1.75    | 0.63     | 26.23      | 19.8       | 48.41     | 1.74     | 1.98       | 27.3       |
| Pre 14 | 1.32    | 0.2      | 26.9       | 24.8       | 53.22     | 2.9      | 2.52       | 28.98      |
| Pre 15 | 1.56    | 0.5      | 20.1       | 22.4       | 43.9      | 1.2      | 1.23       | 26.9       |
| Pre 16 | 1.42    | 0        | 21.2       | 24.5       | 47.26     | 1.87     | 1.65       | 27.32      |
| Pre 17 | 1.63    | 0.33     | 24.36      | 19.9       | 46.01     | 1.31     | 2.8        | 23.34      |
| Pre 18 | 1.24    | 0        | 20.2       | 23.5       | 45.33     | 2.1      | 1.45       | 29.52      |
| Pre 19 | 1.5     | 0.85     | 25.68      | 18.72      | 46.49     | 2.4      | 1.85       | 27.52      |
| Pre 20 | 1.3     | 0.82     | 18.32      | 21.36      | 41.48     | 1.31     | 2          | 25.98      |
| Pre 21 | 1.8     | 0.45     | 20.54      | 21.32      | 43.18     | 1.85     | 2.13       | 26.3       |
| Pre 22 | 1.2     | 0.63     | 26.23      | 19.8       | 48.41     | 1.74     | 1.98       | 27.3       |
| Pre 23 | 0.9     | 0.2      | 26.9       | 24.8       | 53.22     | 2.9      | 2.52       | 28.98      |
| Pre 24 | 0.98    | 0        | 23.58      | 21.95      | 47.03     | 2.01     | 1.36       | 26.32      |
| Pre 25 | 0.87    | 0        | 21.33      | 24.36      | 46.99     | 1.8      | 2.1        | 28.02      |
| Pre 26 | 1.75    | 0.3      | 25.2       | 20.9       | 48.2      | 1.3      | 1.8        | 29.3       |
| Pre 27 | 1.32    | 0.2      | 25.9       | 19.8       | 47.1      | 2.5      | 1.2        | 27.9       |
| Pre 28 | 1.63    | 0.33     | 24.36      | 19.9       | 46.01     | 1.31     | 2.8        | 23.34      |
| Pre 29 | 1.24    | 0        | 20.2       | 23.5       | 45.33     | 2.1      | 1.45       | 29.52      |
| Pre 30 | 0.98    | 0.85     | 25.68      | 18.72      | 46.49     | 2.4      | 1.85       | 27.52      |
| Mean   | 1.30324 | 0.487    | 23.04154   | 21.79308   | 46.50769  | 1.868462 | 1.851538   | 27.28462   |
| Stdev  | 0.30123 | 0.244349 | 2.864608   | 2.009268   | 2.854036  | 0.519164 | 0.481419   | 1.63858    |

| MUFA     | C - 18 : 2 | C - 18 : 3 | c-20:2   | C - 20 : 4 | C - 22:6 | PUFA     | C18:0/C18:n3/n6 |          |  |
|----------|------------|------------|----------|------------|----------|----------|-----------------|----------|--|
| 29.69    | 19.5       | 1.9        | 0.74     | 1.01       | 0.54     | 23.69    | 0.833967        | 3.677692 |  |
| 31.92    | 19.9       | 2.5        | 0.63     | 1.3        | 0.42     | 24.75    | 0.869379        | 4.451106 |  |
| 32.4     | 21.2       | 1.9        | 0        | 1.6        | 0.65     | 25.35    | 0.713311        | 3.53066  |  |
| 31.6     | 23.9       | 0          | 0.68     | 0          | 0.22     | 24.8     | 0.709677        | 0.689205 |  |
| 29.33    | 18.5       | 1.4        | 0.24     | 1.2        | 0.21     | 21.55    | 0.832714        | 2.851351 |  |
| 30.84    | 20.1       | 0.8        | 0.32     | 1.05       | 0.71     | 22.98    | 0.896779        | 2.205323 |  |
| 27.45    | 21.3       | 0.7        | 0.41     | 0.99       | 0        | 23.4     | 0.852614        | 2.1      |  |
| 33.07    | 19.52      | 0.89       | 0.8      | 1.56       | 0.87     | 23.64    | 0.79607         | 3.29457  |  |
| 31.77    | 22.2       | 1.2        | 0        | 1.67       | 0.61     | 25.68    | 0.680233        | 2.897477 |  |
| 29.29    | 20.2       | 0          | 0.75     | 0.96       | 0.65     | 22.56    | 0.822171        | 1.742178 |  |
| 30.28    | 17.3       | 2.7        | 0.11     | 0.32       | 0.55     | 20.98    | 0.810646        | 3.161792 |  |
| 31.02    | 19.32      | 1.6        | 0        | 1.85       | 0.35     | 23.12    | 0.725275        | 3.468116 |  |
| 34.4     | 20.3       | 1.2        | 0.43     | 0.77       | 0.36     | 23.06    | 0.855763        | 2.417734 |  |
| 29.33    | 18.5       | 1.4        | 0.24     | 1.2        | 0.21     | 21.55    | 0.832714        | 2.851351 |  |
| 30.84    | 20.1       | 0.8        | 0.32     | 1.05       | 0.71     | 22.98    | 0.896779        | 2.205323 |  |
| 27.45    | 21.3       | 0.7        | 0.41     | 0.99       | 0        | 23.4     | 0.852614        | 2.1      |  |
| 33.07    | 19.52      | 0.89       | 0.8      | 1.56       | 0.87     | 23.64    | 0.79607         | 3.29457  |  |
| 31.77    | 22.2       | 1.2        | 0        | 1.67       | 0.61     | 25.68    | 0.680233        | 2.897477 |  |
| 29.29    | 20.2       | 0          | 0.75     | 0.96       | 0.65     | 22.56    | 0.822171        | 1.742178 |  |
| 30.28    | 17.3       | 2.7        | 0.11     | 0.32       | 0.55     | 20.98    | 0.810646        | 3.161792 |  |
| 31.02    | 19.32      | 1.6        | 0        | 1.85       | 0.35     | 23.12    | 0.725275        | 3.468116 |  |
| 34.4     | 20.3       | 1.2        | 0.43     | 0.77       | 0.36     | 23.06    | 0.855763        | 2.417734 |  |
| 29.69    | 19.5       | 1.9        | 0.74     | 1.01       | 0.54     | 23.69    | 0.833967        | 3.677692 |  |
| 31.92    | 19.9       | 2.5        | 0.63     | 1.3        | 0.42     | 24.75    | 0.869379        | 4.451106 |  |
| 32.4     | 21.2       | 1.9        | 0        | 1.6        | 0.65     | 25.35    | 0.713311        | 3.53066  |  |
| 31.6     | 23.9       | 0          | 0.68     | 0          | 0.22     | 24.8     | 0.709677        | 0.689205 |  |
| 27.45    | 21.3       | 0.7        | 0.41     | 0.99       | 0        | 23.4     | 0.852614        | 2.1      |  |
| 33.07    | 19.52      | 0.89       | 0.8      | 1.56       | 0.87     | 23.64    | 0.79607         | 3.29457  |  |
| 31.77    | 22.2       | 1.2        | 0        | 1.67       | 0.61     | 25.68    | 0.680233        | 2.897477 |  |
| 31.00462 | 20.24923   | 1.291538   | 0.512    | 1.098462   | 0.472308 | 23.50462 | 0.799892        | 2.806708 |  |
| 1.829843 | 1.658445   | 0.836519   | 0.232574 | 0.529825   | 0.240352 | 1.388576 | 0.069823        | 0.975875 |  |

| c18:2/C18: | C18:3/C18:1 | sat/Unsat |
|------------|-------------|-----------|
| 0.740881   | 0.07218845  | 25.27404  |
| 0.710207   | 0.089221984 | 26.22212  |
| 0.723549   | 0.064846416 | 26.83765  |
| 0.856631   | 0           | 26.29051  |
| 0.687732   | 0.05204461  | 23.04676  |
| 0.735725   | 0.029282577 | 24.51243  |
| 0.912596   | 0.029991431 | 25.07614  |
| 0.661247   | 0.030149051 | 25.01073  |
| 0.806686   | 0.043604651 | 27.14333  |
| 0.777521   | 0           | 23.97618  |
| 0.657795   | 0.102661597 | 22.40602  |
| 0.707692   | 0.058608059 | 24.68061  |
| 0.700483   | 0.041407867 | 24.60709  |
| 0.687732   | 0.05204461  | 23.04676  |
| 0.735725   | 0.029282577 | 24.51243  |
| 0.912596   | 0.029991431 | 25.07614  |
| 0.661247   | 0.030149051 | 25.01073  |
| 0.806686   | 0.043604651 | 27.14333  |
| 0.777521   | 0           | 23.97618  |
| 0.657795   | 0.102661597 | 22.40602  |
| 0.707692   | 0.058608059 | 24.68061  |
| 0.700483   | 0.041407867 | 24.60709  |
| 0.740881   | 0.07218845  | 25.27404  |
| 0.710207   | 0.089221984 | 26.22212  |
| 0.723549   | 0.064846416 | 26.83765  |
| 0.856631   | 0           | 26.29051  |
| 0.912596   | 0.029991431 | 25.07614  |
| 0.661247   | 0.030149051 | 25.01073  |
| 0.806686   | 0.043604651 | 27.14333  |
| 0.744519   | 0.047231284 | 25.08267  |
| 0.075529   | 0.030742635 | 1.349545  |
