# Supplementary material for: Radiotherapy improves serum fatty acids and lipid profile in breast cancer
Source: PubMed Central journal article supplement (PMC5437547; doi:10.1186/s12944-017-0481-y), 2017-05-18
Supplement: 12944_2017_481_MOESM4_ESM.pdf [file 12944_2017_481_MOESM4_ESM.pdf]

## Pre Total Fatty acid

|        | C - 14:0 | C-15:0   | C - 16 : 0 | C - 18 : 0 | Total SFA | C 14:1   | C - 16 : 1 | C - 18 : 1 |
|--------|----------|----------|------------|------------|-----------|----------|------------|------------|
| Pre 1  |          |          |            |            |           |          |            |            |
| Pre 2  | 1.5      | 0        | 23.58      | 21.95      | 47.03     | 0.62     | 1.36       | 26.32      |
| Pre 3  | 1.3      | 0        | 21.33      | 24.36      | 46.99     | 1.1      | 2.1        | 24.6       |
| Pre 4  | 1.8      | 0.3      | 25.2       | 20.9       | 48.2      | 1.2      | 1.8        | 25.3       |
| Pre 5  | 1.2      | 0.2      | 19.8       | 25.9       | 47.1      | 0.5      | 1.2        | 23.7       |
| Pre 6  | 0.9      | 0.5      | 20.1       | 22.4       | 43.9      | 1.2      | 1.36       | 22.3       |
| Pre 7  | 1.56     | 0        | 21.2       | 24.5       | 47.26     | 0.87     | 1.65       | 24.3       |
| Pre 8  | 1.42     | 0.33     | 24.36      | 19.9       | 46.01     | 1.31     | 0.98       | 23.34      |
| Pre 9  | 1.63     | 0        | 24.32      | 27.08      | 53.03     | 2.1      | 1.45       | 27.52      |
| Pre 10 | 1.24     | 0.85     | 19.68      | 24.72      | 46.49     | 0.68     | 1.85       | 26.31      |
| Pre 11 | 0.98     | 0.82     | 18.32      | 21.36      | 41.48     | 0.31     | 1.96       | 25.98      |
| Pre 12 | 0.87     | 0.45     | 20.54      | 21.32      | 43.18     | 1.85     | 2.13       | 26.3       |
| Pre 13 | 1.75     | 0.63     | 26.23      | 19.8       | 48.41     | 1.74     | 1.98       | 27.3       |
| Pre 14 | 1.32     | 0.2      | 24.9       | 25.8       | 52.22     | 2.1      | 2.52       | 26.98      |
| Pre 15 | 0.9      | 0.5      | 20.1       | 24.5       | 47.26     | 0.87     | 1.65       | 24.3       |
| Pre 16 | 1.56     | 0        | 21.2       | 19.9       | 46.01     | 1.31     | 0.98       | 23.34      |
| Pre 17 | 1.42     | 0.33     | 24.36      | 27.08      | 53.03     | 2.1      | 1.45       | 27.52      |
| Pre 18 | 1.63     | 0        | 24.32      | 24.72      | 46.49     | 0.68     | 1.85       | 26.31      |
| Pre 19 | 1.24     | 0.85     | 19.68      | 21.95      | 47.03     | 0.62     | 1.36       | 26.32      |
| Pre 20 | 1.5      | 0        | 23.58      | 24.36      | 46.99     | 1.1      | 2.1        | 24.6       |
| Pre 21 | 1.3      | 0        | 21.33      | 20.9       | 48.2      | 1.2      | 1.8        | 25.3       |
| Pre 22 | 1.8      | 0.3      | 25.2       | 25.9       | 47.1      | 0.5      | 1.2        | 23.7       |
| Pre 23 | 1.2      | 0.2      | 19.8       | 22.4       | 43.9      | 1.2      | 1.36       | 22.3       |
| Pre 24 | 0.98     | 0.82     | 18.32      | 21.36      | 41.48     | 0.31     | 1.96       | 25.98      |
| Pre 25 | 0.87     | 0.45     | 20.54      | 21.32      | 43.18     | 1.85     | 2.13       | 26.3       |
| Pre 26 | 1.75     | 0.63     | 26.23      | 19.8       | 48.41     | 1.74     | 1.98       | 27.3       |
| Pre 27 | 1.32     | 0.2      | 24.9       | 25.8       | 52.22     | 2.1      | 2.52       | 26.98      |
| Pre 28 | 1.2      | 0.2      | 19.8       | 22.4       | 43.9      | 1.2      | 1.36       | 22.3       |
| Pre 29 | 0.9      | 0.5      | 20.1       | 24.5       | 47.26     | 0.87     | 1.65       | 24.3       |
| Pre 30 | 1.56     | 0        | 21.2       | 19.9       | 46.01     | 1.31     | 0.98       | 23.34      |
| Mean   | 1.331034 | 0.473    | 22.07655   | 22.99241   | 46.88862  | 1.191034 | 1.678276   | 25.18759   |
| Stdev  | 0.398752 | 0.227321 | 2.464703   | 2.349743   | 3.025817  | 0.561461 | 0.428603   | 1.666966   |

| MUFA     | C - 18 : 2 | C - 18 : 3 | c-20:2   | C - 20 : 4 | C - 22:6 | PUFA     | C18:0/C18:n3/n6 |          |
|----------|------------|------------|----------|------------|----------|----------|-----------------|----------|
| 28.3     | 20.28      | 2.1        | 0.74     | 1.01       | 0.54     | 24.67    | 0.833967        | 3.876627 |
| 27.8     | 19.9       | 2.5        | 0.63     | 1.3        | 0.42     | 24.75    | 0.990244        | 4.451106 |
| 28.3     | 21.2       | 1.9        | 0.85     | 1.6        | 0.65     | 26.2     | 0.826087        | 4.38066  |
| 25.4     | 23.9       | 1.7        | 0.68     | 1.9        | 0.22     | 28.4     | 1.092827        | 4.289205 |
| 24.86    | 18.5       | 1.4        | 0.24     | 1.2        | 0.21     | 21.55    | 1.004484        | 2.851351 |
| 26.82    | 20.1       | 1.1        | 0.32     | 1.05       | 0.71     | 23.28    | 1.00823         | 2.505323 |
| 25.63    | 22.3       | 0.7        | 0.41     | 0.99       | 0.52     | 24.92    | 0.852614        | 2.123318 |
| 31.07    | 19.52      | 0.89       | 1.2      | 1.56       | 0.87     | 24.04    | 0.984012        | 3.69457  |
| 28.84    | 22.2       | 2          | 0.33     | 1.67       | 0.61     | 26.81    | 0.939567        | 4.027477 |
| 28.25    | 20.2       | 1.78       | 0.75     | 0.96       | 0.65     | 24.34    | 0.822171        | 3.522178 |
| 30.28    | 17.3       | 2.7        | 0.11     | 0.32       | 0.55     | 20.98    | 0.810646        | 3.161792 |
| 31.02    | 19.32      | 2.05       | 0.86     | 1.85       | 0.35     | 24.43    | 0.725275        | 4.778116 |
| 31.6     | 23.7       | 1.2        | 0.43     | 0.77       | 0.36     | 26.46    | 0.956264        | 2.41519  |
| 26.82    | 20.1       | 1.1        | 0.32     | 1.05       | 0.71     | 23.28    | 1.00823         | 2.505323 |
| 25.63    | 22.3       | 0.7        | 0.41     | 0.99       | 0.52     | 24.92    | 0.852614        | 2.123318 |
| 31.07    | 19.52      | 0.89       | 1.2      | 1.56       | 0.87     | 24.04    | 0.984012        | 3.69457  |
| 28.84    | 22.2       | 2          | 0.33     | 1.67       | 0.61     | 26.81    | 0.939567        | 4.027477 |
| 28.3     | 20.28      | 2.1        | 0.74     | 1.01       | 0.54     | 24.67    | 0.833967        | 3.876627 |
| 27.8     | 19.9       | 2.5        | 0.63     | 1.3        | 0.42     | 24.75    | 0.990244        | 4.451106 |
| 28.3     | 21.2       | 1.9        | 0.85     | 1.6        | 0.65     | 26.2     | 0.826087        | 4.38066  |
| 25.4     | 23.9       | 1.7        | 0.68     | 1.9        | 0.22     | 28.4     | 1.092827        | 4.289205 |
| 24.86    | 18.5       | 1.4        | 0.24     | 1.2        | 0.21     | 21.55    | 1.004484        | 2.851351 |
| 28.25    | 20.2       | 1.78       | 0.75     | 0.96       | 0.65     | 24.34    | 0.822171        | 3.522178 |
| 30.28    | 17.3       | 2.7        | 0.11     | 0.32       | 0.55     | 20.98    | 0.810646        | 3.161792 |
| 31.02    | 19.32      | 2.05       | 0.86     | 1.85       | 0.35     | 24.43    | 0.725275        | 4.778116 |
| 31.6     | 23.7       | 1.2        | 0.43     | 0.77       | 0.36     | 26.46    | 0.956264        | 2.41519  |
| 24.86    | 18.5       | 1.4        | 0.24     | 1.2        | 0.21     | 21.55    | 1.004484        | 2.851351 |
| 26.82    | 20.1       | 1.1        | 0.32     | 1.05       | 0.71     | 23.28    | 1.00823         | 2.505323 |
| 25.63    | 22.3       | 0.7        | 0.41     | 0.99       | 0.52     | 24.92    | 0.852614        | 2.123318 |
| 28.0569  | 20.61172   | 1.628966   | 0.554138 | 1.227586   | 0.508966 | 24.53138 | 0.915797        | 3.545649 |
| 2.231403 | 1.874456   | 0.601595   | 0.294843 | 0.428858   | 0.192119 | 1.991738 | 0.101842        | 0.869492 |

| c18:2/C18: | C18:3/C18:1 | sat/unsat |
|------------|-------------|-----------|
| 0.770517   | 0.079787234 | 26.33184  |
| 0.808943   | 0.101626016 | 26.44029  |
| 0.837945   | 0.075098814 | 27.90318  |
| 1.008439   | 0.071729958 | 30.25433  |
| 0.829596   | 0.062780269 | 23.31589  |
| 0.82716    | 0.04526749  | 25.04212  |
| 0.955441   | 0.029991431 | 26.71516  |
| 0.709302   | 0.032340116 | 25.74679  |
| 0.843786   | 0.076016724 | 28.422    |
| 0.777521   | 0.068514242 | 25.80832  |
| 0.657795   | 0.102661597 | 22.40602  |
| 0.707692   | 0.075091575 | 25.99061  |
| 0.878428   | 0.044477391 | 28.11253  |
| 0.82716    | 0.04526749  | 25.04212  |
| 0.955441   | 0.029991431 | 26.71516  |
| 0.709302   | 0.032340116 | 25.74679  |
| 0.843786   | 0.076016724 | 28.422    |
| 0.770517   | 0.079787234 | 26.33184  |
| 0.808943   | 0.101626016 | 26.44029  |
| 0.837945   | 0.075098814 | 27.90318  |
| 1.008439   | 0.071729958 | 30.25433  |
| 0.829596   | 0.062780269 | 23.31589  |
| 0.777521   | 0.068514242 | 25.80832  |
| 0.657795   | 0.102661597 | 22.40602  |
| 0.707692   | 0.075091575 | 25.99061  |
| 0.878428   | 0.044477391 | 28.11253  |
| 0.829596   | 0.062780269 | 23.31589  |
| 0.82716    | 0.04526749  | 25.04212  |
| 0.955441   | 0.029991431 | 26.71516  |
| 0.821977   | 0.074441548 | 26.20867  |
| 0.093747   | 0.022794942 | 2.029966  |
