# Supplementary material for: Radiotherapy improves serum fatty acids and lipid profile in breast cancer
Source: PubMed Central journal article supplement (PMC5437547; doi:10.1186/s12944-017-0481-y), 2017-05-18
Supplement: 12944_2017_481_MOESM5_ESM.pdf [file 12944_2017_481_MOESM5_ESM.pdf]

## Control

|       | C - 14:0 | C-15:0   | C - 16 : 0 | C - 18 : 0 | SFA      | C 14:1   | C - 16 : 1 | C - 18 : 1 |
|-------|----------|----------|------------|------------|----------|----------|------------|------------|
| 1     | 2.182139 | 0        | 12.6392    | 10.80181   | 25.62315 | 1.736203 | 2.367094   | 20.73493   |
| 2     | 1.440033 | 0        | 14.66196   | 19.31209   | 35.41409 | 0.269294 | 4.661961   | 20.04824   |
| 3     | 0        | 0.4      | 24.90226   | 18.25015   | 43.15242 | 0        | 0          | 16.12092   |
| 4     | 0        | 0.3      | 25.77806   | 10.02699   | 35.80505 | 0        | 3.303863   | 19.60403   |
| 5     | 2.484136 | 1.32     | 16.32606   | 14.36174   | 33.17194 | 0.229192 | 2.939904   | 18.74987   |
| 6     | 0        | 0        | 12.98722   | 9.98155    | 22.96877 | 0        | 3.3916     | 18.54336   |
| 7     | 1.512309 | 1.76     | 19.94444   | 14.53976   | 35.9965  | 0        | 1.675367   | 24.17404   |
| 8     | 0        | 0        | 24.90226   | 18.25015   | 43.15242 | 0        | 0          | 16.12092   |
| 9     | 0        | 1.9      | 25.77806   | 10.02699   | 35.80505 | 0        | 3.303863   | 19.60403   |
| 10    | 2.484136 | 2.8      | 16.32606   | 10.80181   | 25.62315 | 1.736203 | 2.367094   | 20.73493   |
| 11    | 2.182139 | 0        | 12.6392    | 19.31209   | 35.41409 | 0.269294 | 4.661961   | 20.04824   |
| 12    | 1.440033 | 0        | 14.66196   | 14.36174   | 33.17194 | 0.229192 | 2.939904   | 18.74987   |
| 13    | 0        | 0.4      | 12.98722   | 9.98155    | 22.96877 | 0        | 3.3916     | 18.54336   |
| 14    | 1.512309 | 0        | 19.94444   | 14.53976   | 35.9965  | 0        | 1.675367   | 24.17404   |
| 15    | 2.182139 | 2.3      | 12.6392    | 10.80181   | 25.62315 | 1.736203 | 2.367094   | 20.73493   |
| 16    | 1.440033 | 0        | 14.66196   | 19.31209   | 35.41409 | 0.269294 | 4.661961   | 20.04824   |
| 17    | 1.98765  | 2.5      | 12.98722   | 14.36174   | 33.17194 | 0.229192 | 2.939904   | 18.74987   |
| 18    | 1.512309 | 0        | 19.94444   | 9.98155    | 22.96877 | 0        | 3.3916     | 18.54336   |
| 19    | 0.866573 | 1.7      | 24.90226   | 14.53976   | 35.9965  | 0        | 1.675367   | 24.17404   |
| 20    | 0        | 1.23     | 25.77806   | 18.25015   | 43.15242 | 0        | 0          | 16.12092   |
| 21    | 2.484136 | 0        | 16.32606   | 10.02699   | 35.80505 | 0        | 3.303863   | 19.60403   |
| 22    | 0.9832   | 1.23     | 12.98722   | 14.36174   | 33.17194 | 0.229192 | 2.939904   | 18.74987   |
| 23    | 1.512309 | 0        | 19.94444   | 9.98155    | 22.96877 | 0        | 3.3916     | 18.54336   |
| 24    | 1.096    | 2.5      | 24.90226   | 14.53976   | 35.9965  | 0        | 1.675367   | 24.17404   |
| 25    | 0        | 0        | 25.77806   | 10.80181   | 25.62315 | 1.736203 | 2.367094   | 20.73493   |
| 26    | 2.484136 | 0        | 16.32606   | 19.31209   | 35.41409 | 0.269294 | 4.661961   | 20.04824   |
| 27    | 2.182139 | 0.3      | 12.6392    | 18.25015   | 43.15242 | 0        | 0          | 16.12092   |
| 28    | 1.440033 | 0.9      | 14.66196   | 10.02699   | 35.80505 | 0        | 3.303863   | 19.60403   |
| 29    | 1.5657   | 1.6      | 15.456     | 14.36174   | 33.17194 | 0.229192 | 2.939904   | 18.74987   |
| 30    | 0.005    | 1.1      | 11.9845    | 10.80181   | 25.62315 | 1.736203 | 2.367094   | 20.73493   |
| Mean  | 1.23262  | 1.438125 | 18.24351   | 14.65483   | 33.16206 | 0.778868 | 2.631002   | 19.67764   |
| Stdev | 0.911304 | 0.83553  | 5.037451   | 3.562552   | 6.331743 | 0.740677 | 1.372192   | 2.283201   |

Total fatty acid

| MUFA     | C - 18 : 2 | C - 18 : 3 | C - 20 : 4 | C - 20:2 | C - 22:6 | PUFA       | C18:0/C18:n3/n6 |          |  |
|----------|------------|------------|------------|----------|----------|------------|-----------------|----------|--|
| 24.83823 | 32.8383    | 1.846906   | 11.79691   | 0.719876 | 0.123769 | 47.32576   | 0.520948        | 14.36746 |  |
| 24.97949 | 25.21181   | 0.178694   | 8.303023   | 2.100137 |          | 0 35.79366 | 0.963281        | 10.58185 |  |
| 16.12092 | 31.89112   | 0          | 5.415733   | 0        | 0        | 37.30686   | 1.132079        | 5.415733 |  |
| 22.9079  | 31.36122   | 0          | 7.3953     | 0        | 0        | 38.75652   | 0.511476        | 7.3953   |  |
| 21.91896 | 23.61601   | 1.411576   | 9.606536   | 2.75871  | 0.816649 | 38.20948   | 0.765965        | 13.8114  |  |
| 21.93496 | 30.77999   | 0          | 7.912082   | 6.119816 | 0        | 44.81189   | 0.538282        | 14.0319  |  |
| 25.84941 | 28.29885   | 0.16379    | 3.905618   | 0.208944 | 0.453679 | 33.03088   | 0.601462        | 4.294384 |  |
| 16.12092 | 31.89112   | 0          | 5.415733   | 0        | 0        | 37.30686   | 1.132079        | 5.415733 |  |
| 22.9079  | 31.36122   | 0          | 7.3953     | 0        | 0        | 38.75652   | 0.511476        | 7.3953   |  |
| 24.83823 | 32.8383    | 1.846906   | 11.79691   | 0.719876 | 0.123769 | 47.32576   | 0.520948        | 14.36746 |  |
| 24.97949 | 25.21181   | 0.178694   | 8.303023   | 2.100137 |          | 0 35.79366 | 0.963281        | 10.58185 |  |
| 21.91896 | 23.61601   | 1.411576   | 9.606536   | 2.75871  | 0.816649 | 38.20948   | 0.765965        | 13.8114  |  |
| 21.93496 | 30.77999   | 0          | 7.912082   | 6.119816 | 0        | 44.81189   | 0.538282        | 14.0319  |  |
| 25.84941 | 28.29885   | 0.16379    | 3.905618   | 0        | 0.453679 | 33.03088   | 0.601462        | 4.294384 |  |
| 24.83823 | 32.8383    | 1.846906   | 11.79691   | 0.719876 | 0.123769 | 47.32576   | 0.520948        | 14.36746 |  |
| 24.97949 | 25.21181   | 0.178694   | 8.303023   | 2.100137 |          | 0 35.79366 | 0.963281        | 10.58185 |  |
| 21.91896 | 23.61601   | 1.411576   | 9.606536   | 2.75871  | 0.816649 | 38.20948   | 0.765965        | 13.8114  |  |
| 21.93496 | 30.77999   | 0          | 7.912082   | 6.119816 | 0        | 44.81189   | 0.538282        | 14.0319  |  |
| 25.84941 | 28.29885   | 0.16379    | 3.905618   | 0.208944 | 0.453679 | 33.03088   | 0.601462        | 4.294384 |  |
| 16.12092 | 31.89112   | 0          | 5.415733   | 0        | 0        | 37.30686   | 1.132079        | 5.415733 |  |
| 22.9079  | 31.36122   | 0          | 7.3953     | 0        | 0        | 38.75652   | 0.511476        | 7.3953   |  |
| 21.91896 | 23.61601   | 1.411576   | 9.606536   | 2.75871  | 0.816649 | 38.20948   | 0.765965        | 13.8114  |  |
| 21.93496 | 30.77999   | 0          | 7.912082   | 0        | 0        | 44.81189   | 0.538282        | 14.0319  |  |
| 25.84941 | 28.29885   | 0.16379    | 3.905618   | 0.208944 | 0.453679 | 33.03088   | 0.601462        | 4.294384 |  |
| 24.83823 | 32.8383    | 1.846906   | 11.79691   | 0.719876 | 0.123769 | 47.32576   | 0.520948        | 5.367461 |  |
| 24.97949 | 25.21181   | 0.178694   | 8.303023   | 2.100137 |          | 0 35.79366 | 0.963281        | 10.58185 |  |
| 16.12092 | 31.89112   | 0          | 5.415733   | 0        | 0        | 37.30686   | 1.132079        | 5.415733 |  |
| 22.9079  | 31.36122   | 0          | 7.3953     | 0        | 0        | 38.75652   | 0.511476        | 7.3953   |  |
| 21.91896 | 23.61601   | 1.411576   | 9.606536   | 2.75871  | 0.816649 | 38.20948   | 0.765965        | 9.811402 |  |
| 24.83823 | 32.8383    | 1.846906   | 11.79691   | 0.719876 | 0.123769 | 47.32576   | 0.520948        | 14.36746 |  |
| 22.62477 | 28.9519    | 0.981241   | 7.72577    | 0.65     | 0.465486 | 39.28102   | 0.720687        | 8.323411 |  |
| 3.031294 | 3.281226   | 0.76397    | 2.429881   | 0.231909 | 0.303947 | 4.662034   | 0.227348        | 3.20123  |  |

c18:2/C18: C18:3/C18:1 satu/unsat

|          |           |            |
|----------|-----------|------------|
| 1.583719 | 0.0890722 | 48.3573613 |
| 1.257557 | 0.0089132 | 37.2113867 |
| 1.978244 | 0         | 39.9836564 |
| 1.599733 | 0         | 40.3195201 |
| 1.259529 | 0.0752846 | 39.7228702 |
| 1.659893 | 0         | 45.8590207 |
| 1.17063  | 0.0067755 | 34.4234263 |
| 1.978244 | 0         | 39.9836564 |
| 1.599733 | 0         | 40.3195201 |
| 1.583719 | 0.0890722 | 48.3573613 |
| 1.257557 | 0.0089132 | 37.2113867 |
| 1.259529 | 0.0752846 | 39.7228702 |
| 1.659893 | 0         | 45.8590207 |
| 1.17063  | 0.0067755 | 34.4234263 |
| 1.583719 | 0.0890722 | 48.3573613 |
| 1.257557 | 0.0089132 | 37.2113867 |
| 1.259529 | 0.0752846 | 39.7228702 |
| 1.659893 | 0         | 45.8590207 |
| 1.17063  | 0.0067755 | 34.4234263 |
| 1.978244 | 0         | 39.9836564 |
| 1.599733 | 0         | 40.3195201 |
| 1.259529 | 0.0752846 | 39.7228702 |
| 1.659893 | 0         | 45.8590207 |
| 1.17063  | 0.0067755 | 34.4234263 |
| 1.583719 | 0.0890722 | 48.3573613 |
| 1.257557 | 0.0089132 | 37.2113867 |
| 1.978244 | 0         | 39.9836564 |
| 1.599733 | 0         | 40.3195201 |
| 1.259529 | 0.0752846 | 39.7228702 |
| 1.583719 | 0.0890722 | 48.3573613 |
| 1.492991 | 0.049141  | 41.0529733 |
| 0.270034 | 0.0383808 | 4.50765627 |
