# Supplementary material for: Radiotherapy improves serum fatty acids and lipid profile in breast cancer
Source: PubMed Central journal article supplement (PMC5437547; doi:10.1186/s12944-017-0481-y), 2017-05-18
Supplement: 12944_2017_481_MOESM6_ESM.pdf [file 12944_2017_481_MOESM6_ESM.pdf]

## Control Free

|       | C - 14:0 | C - 16:0 | C - 18:0 | SFA      | C 14:1   | C - 16:1 | C - 18:1 | MUFA       |
|-------|----------|----------|----------|----------|----------|----------|----------|------------|
| 1     | 3.365197 | 22.1203  | 24.32838 | 49.81387 | 0.718751 | 3.373793 | 22.68861 | 26.78116   |
| 2     | 0.931092 | 18.44437 | 15.27828 | 34.65374 | 0.154608 | 3.46965  | 20.32159 | 23.94585   |
| 3     | 1.643152 | 10.08272 | 22.5569  | 34.28278 | 1.358811 | 4.52499  | 16.2702  | 22.154     |
| 4     | 1.864289 | 15.2141  | 23.23    | 40.30839 | 1.235647 | 3.155295 | 18.94653 | 23.33747   |
| 5     | 0.627388 | 18.26107 | 11.56826 | 30.45671 | 0.316065 | 2.526449 | 22.91771 | 25.76022   |
| 6     | 1.3417   | 23.61317 | 11.44516 | 36.40003 | 0        | 2.3417   | 20.11129 | 22.45299   |
| 7     | 1.287    | 24.52583 | 8.666017 | 34.47885 | 0        | 2.500597 | 20.55049 | 23.05109   |
| 8     | 1.643152 | 10.08272 | 22.5569  | 34.28278 | 1.358811 | 4.52499  | 16.2702  | 22.154     |
| 9     | 1.864289 | 15.2141  | 23.23    | 40.30839 | 1.235647 | 3.155295 | 18.94653 | 23.33747   |
| 10    | 0.627388 | 18.26107 | 11.56826 | 30.45671 | 0.316065 | 2.526449 | 22.91771 | 25.76022   |
| 11    | 3.365197 | 22.1203  | 24.32838 | 49.81387 | 0.718751 | 3.373793 | 22.68861 | 26.78116   |
| 12    | 0.931092 | 18.44437 | 15.27828 | 34.65374 | 0.154608 | 3.46965  | 20.32159 | 23.94585   |
| 13    | 0.627388 | 18.26107 | 11.56826 | 30.45671 | 0.316065 | 2.526449 | 22.91771 | 25.76022   |
| 14    | 1.3417   | 23.61317 | 11.44516 | 36.40003 | 0        | 2.3417   | 20.11129 | 22.45299   |
| 15    | 1.287    | 24.52583 | 8.666017 | 34.47885 | 0        | 2.500597 | 20.55049 | 23.05109   |
| 16    | 3.365197 | 22.1203  | 24.32838 | 49.81387 | 0.718751 | 3.373793 | 22.68861 | 26.78116   |
| 17    | 0.931092 | 18.44437 | 15.27828 | 34.65374 | 0.154608 | 3.46965  | 20.32159 | 23.94585   |
| 18    | 1.3417   | 23.61317 | 11.44516 | 36.40003 | 0        | 2.3417   | 20.11129 | 22.45299   |
| 19    | 1.287    | 24.52583 | 8.666017 | 34.47885 | 0        | 2.500597 | 20.55049 | 23.05109   |
| 20    | 1.643152 | 10.08272 | 12.5569  | 34.28278 | 1.358811 | 4.52499  | 16.2702  | 22.154     |
| 21    | 1.864289 | 15.2141  | 23.23    | 40.30839 | 1.235647 | 3.155295 | 18.94653 | 23.33747   |
| 22    | 0.627388 | 18.26107 | 11.56826 | 30.45671 | 0.316065 | 2.526449 | 22.91771 | 25.76022   |
| 23    | 1.3417   | 23.61317 | 11.44516 | 36.40003 | 0        | 2.3417   | 20.11129 | 22.45299   |
| 24    | 3.365197 | 22.1203  | 24.32838 | 49.81387 | 0.718751 | 3.373793 | 22.68861 | 26.78116   |
| 25    | 0.931092 | 18.44437 | 15.27828 | 34.65374 | 0.154608 | 3.46965  | 20.32159 | 23.94585   |
| 26    | 1.864289 | 15.2141  | 13.23    | 40.30839 | 1.235647 | 3.155295 | 18.94653 | 23.33747   |
| 27    | 1.287    | 24.52583 | 8.666017 | 34.47885 | 0        | 2.500597 | 20.55049 | 23.05109   |
| 28    | 1.643152 | 10.08272 | 15.25569 | 34.28278 | 1.358811 | 4.52499  | 16.2702  | 22.154     |
| 29    | 1.864289 | 15.2141  | 23.23    | 40.30839 | 1.235647 | 3.155295 | 18.94653 | 23.33747   |
| 30    | 0.627388 | 18.26107 | 11.56826 | 30.45671 | 0.316065 | 2.526449 | 12.91771 | 25.76022   |
| Mean  | 1.267698 | 18.75071 | 13.89231 | 37.07809 | 0.756776 | 2.619839 | 19.713   | 23.967627  |
| Stdev | 0.929313 | 5.069059 | 3.561348 | 5.883396 | 0.492051 | 1.370378 | 2.213021 | 1.61257814 |

Fatty acid

| C - 18 : 2 | C - 18 : 3 | C - 20 : 4 | C-22:6   | PUFA     | C18:0/C18: n3/n6 | c18:2/C18: | C18:3/C18:1         |
|------------|------------|------------|----------|----------|------------------|------------|---------------------|
| 11.65746   | 0.638643   | 5.033154   | 1.959019 | 19.28828 | 1.072273         | 5.839846   | 0.513802 0.02814818 |
| 26.76107   | 0          | 9.351494   | 0        | 36.11256 | 0.751825         | 9.351494   | 1.316879 0          |
| 22.30933   | 0          | 8.941002   | 0        | 31.25033 | 1.386394         | 8.941002   | 1.371177 0          |
| 28.75541   | 1.302986   | 4.790661   | 0        | 34.84906 | 1.226082         | 6.093647   | 1.517714 0.06877175 |
| 31.01399   | 2.512427   | 3.511335   | 0.444215 | 37.48197 | 0.504774         | 6.038085   | 1.353276 0.10962819 |
| 31.89112   | 0          | 5.415733   | 0        | 37.30686 | 0.569091         | 5.415733   | 1.585732 0          |
| 31.36122   | 0          | 7.3953     | 0        | 38.75652 | 0.421694         | 7.3953     | 1.526057 0          |
| 22.30933   | 0          | 8.941002   | 0        | 31.25033 | 1.386394         | 8.941002   | 1.371177 0          |
| 28.75541   | 1.302986   | 4.790661   | 0        | 34.84906 | 1.226082         | 6.093647   | 1.517714 0.06877175 |
| 31.01399   | 2.512427   | 3.511335   | 0.444215 | 37.48197 | 0.504774         | 6.038085   | 1.353276 0.10962819 |
| 11.65746   | 0.638643   | 5.033154   | 1.959019 | 19.28828 | 1.072273         | 5.839846   | 0.513802 0.02814818 |
| 26.76107   | 0          | 9.351494   | 0        | 36.11256 | 0.751825         | 9.351494   | 1.316879 0          |
| 31.01399   | 2.512427   | 3.511335   | 0.444215 | 37.48197 | 0.504774         | 6.038085   | 1.353276 0.10962819 |
| 31.89112   | 0          | 5.415733   | 0        | 37.30686 | 0.569091         | 5.415733   | 1.585732 0          |
| 31.36122   | 0          | 7.3953     | 0        | 38.75652 | 0.421694         | 7.3953     | 1.526057 0          |
| 11.65746   | 0.638643   | 5.033154   | 1.959019 | 19.28828 | 1.072273         | 5.839846   | 0.513802 0.02814818 |
| 26.76107   | 0          | 9.351494   | 0        | 36.11256 | 0.751825         | 9.351494   | 1.316879 0          |
| 31.89112   | 0          | 5.415733   | 0        | 37.30686 | 0.569091         | 5.415733   | 1.585732 0          |
| 31.36122   | 0          | 7.3953     | 0        | 38.75652 | 0.421694         | 7.3953     | 1.526057 0          |
| 22.30933   | 0          | 8.941002   | 0        | 31.25033 | 1.386394         | 8.941002   | 1.371177 0          |
| 28.75541   | 1.302986   | 4.790661   | 0        | 34.84906 | 1.226082         | 6.093647   | 1.517714 0.06877175 |
| 31.01399   | 2.512427   | 3.511335   | 0.444215 | 37.48197 | 0.504774         | 6.038085   | 1.353276 0.10962819 |
| 31.89112   | 0          | 5.415733   | 0        | 37.30686 | 0.569091         | 5.415733   | 1.585732 0          |
| 11.65746   | 0.638643   | 5.033154   | 1.959019 | 19.28828 | 1.072273         | 5.839846   | 0.513802 0.02814818 |
| 26.76107   | 0          | 9.351494   | 0        | 36.11256 | 0.751825         | 9.351494   | 1.316879 0          |
| 28.75541   | 1.302986   | 4.790661   | 0        | 34.84906 | 1.226082         | 6.093647   | 1.517714 0.06877175 |
| 31.36122   | 0          | 7.3953     | 0        | 38.75652 | 0.421694         | 7.3953     | 1.526057 0          |
| 22.30933   | 0          | 8.941002   | 0        | 31.25033 | 1.386394         | 8.941002   | 1.371177 0          |
| 28.75541   | 1.302986   | 4.790661   | 0        | 34.84906 | 1.226082         | 6.093647   | 1.517714 0.06877175 |
| 31.01399   | 2.512427   | 3.511335   | 0.444215 | 37.48197 | 0.504774         | 6.038085   | 1.353276 0.10962819 |
| 29.14923   | 1.545117   | 7.762189   | 1.117461 | 33.75045 | 0.719646         | 8.317739   | 1.520318 0.0717566  |
| 3.266907   | 0.797031   | 2.40299    | 0.798372 | 6.187945 | 0.249094         | 3.20085    | 0.285467 0.03376686 |

saturated/unsaturate

21.14831

37.55973

32.79781

36.57626

38.66429

38.92803

40.25228

32.79781

36.57626

38.66429

21.14831

37.55973

38.66429

38.92803

40.25228

21.14831

37.55973

38.92803

40.25228

32.79781

36.57626

38.66429

38.92803

21.14831

37.55973

36.57626

40.25228

32.79781

36.57626

38.66429

35.29824

6.051608
