# Supplementary material for: Radiotherapy improves serum fatty acids and lipid profile in breast cancer
Source: PubMed Central journal article supplement (PMC5437547; doi:10.1186/s12944-017-0481-y), 2017-05-18
Supplement: 12944_2017_481_MOESM7_ESM.pdf [file 12944_2017_481_MOESM7_ESM.pdf]

## Pre Treated

| No of sam | Age | TC  | TG  | HDL | LDL | VLDL | TC:HDL | HDL:LDL |
|-----------|-----|-----|-----|-----|-----|------|--------|---------|
| 1         | 34  | 253 | 148 | 52  | 185 | 29.6 | 4.86   | 0.28    |
| 2         | 38  | 203 | 139 | 40  | 145 | 27.8 | 5.07   | 0.296   |
| 3         | 42  | 252 | 140 | 43  | 178 | 28   | 5.86   | 0.24    |
| 4         | 36  | 226 | 163 | 47  | 156 | 32.6 | 4.8    | 0.3     |
| 5         | 45  | 198 | 169 | 39  | 133 | 33.8 | 5.07   | 0.29    |
| 6         | 47  | 232 | 154 | 48  | 142 | 30.8 | 4.83   | 0.33    |
| 7         | 45  | 211 | 171 | 91  | 138 | 34.2 | 2.31   | 0.65    |
| 8         | 30  | 268 | 160 | 79  | 188 | 32   | 3.39   | 0.42    |
| 9         | 33  | 216 | 167 | 56  | 139 | 33.4 | 3.85   | 0.4     |
| 10        | 25  | 241 | 107 | 72  | 174 | 21.4 | 3.34   | 0.41    |
| 11        | 52  | 249 | 142 | 83  | 176 | 28.4 | 3      | 0.47    |
| 12        | 40  | 191 | 179 | 42  | 128 | 35.8 | 7.95   | 0.18    |
| 13        | 56  | 152 | 129 | 60  | 112 | 25.8 | 2.53   | 0.53    |
| 14        | 60  | 230 | 168 | 54  | 140 | 33.6 | 4.25   | 0.38    |
| 15        | 62  | 231 | 180 | 46  | 141 | 36   | 5.02   | 0.32    |
| 16        | 43  | 204 | 113 | 42  | 138 | 22.6 | 4.85   | 0.3     |
| 17        | 36  | 253 | 124 | 83  | 183 | 24.8 | 3.04   | 0.45    |
| 18        | 39  | 270 | 121 | 34  | 188 | 24.2 | 7.94   | 0.18    |
| 19        | 40  | 239 | 115 | 28  | 153 | 23   | 8.53   | 0.18    |
| 20        | 46  | 235 | 142 | 39  | 142 | 28.4 | 6.02   | 0.27    |
| 21        | 47  | 216 | 137 | 44  | 118 | 27.4 | 4.9    | 0.37    |
| 22        | 33  | 198 | 126 | 46  | 105 | 25.2 | 4.3    | 0.43    |
| 23        | 46  | 205 | 164 | 75  | 112 | 32.8 | 2.73   | 0.66    |
| 24        | 38  | 249 | 154 | 62  | 136 | 30.8 | 4.01   | 0.45    |
| 25        | 33  | 204 | 163 | 73  | 112 | 32.6 | 2.79   | 0.65    |
| 26        | 60  | 210 | 128 | 84  | 111 | 25.6 | 2.5    | 0.75    |
| 27        | 58  | 225 | 132 | 55  | 126 | 26.4 | 4.09   | 0.43    |
| 28        | 46  | 213 | 144 | 59  | 128 | 28.8 | 3.61   | 0.46    |
| 29        | 57  | 228 | 156 | 61  | 130 | 31.2 | 3.73   | 0.46    |
| 30        | 63  | 230 | 108 | 42  | 132 | 21.6 | 5.47   | 0.31    |
| 31        | 33  | 249 | 142 | 83  | 118 | 28.4 | 3      | 0.47    |
| 32        | 25  | 191 | 179 | 42  | 105 | 35.8 | 7.95   | 0.18    |
| 33        | 52  | 152 | 129 | 60  | 112 | 25.8 | 2.53   | 0.53    |
| 34        | 40  | 230 | 168 | 54  | 136 | 33.6 | 4.25   | 0.38    |
| 35        | 56  | 231 | 180 | 46  | 112 | 36   | 5.02   | 0.32    |
| 36        | 60  | 204 | 113 | 42  | 111 | 22.6 | 4.85   | 0.3     |
| 37        | 62  | 253 | 124 | 83  | 126 | 24.8 | 3.04   | 0.45    |
| 38        | 43  | 270 | 121 | 34  | 128 | 24.2 | 7.94   | 0.18    |
| 39        | 36  | 239 | 115 | 28  | 130 | 23   | 8.53   | 0.18    |
| 40        | 39  | 235 | 142 | 52  | 132 | 29.6 | 4.86   | 0.28    |
| 41        | 40  | 253 | 148 | 40  | 176 | 27.8 | 5.07   | 0.296   |
| 42        | 46  | 203 | 139 | 43  | 128 | 28   | 5.86   | 0.24    |
| 43        | 47  | 252 | 140 | 47  | 112 | 32.6 | 4.8    | 0.3     |
| 44        | 33  | 226 | 163 | 39  | 140 | 33.8 | 5.07   | 0.29    |
| 45        | 46  | 198 | 169 | 48  | 141 | 30.8 | 4.83   | 0.33    |
| 46        | 34  | 232 | 154 | 91  | 138 | 34.2 | 2.31   | 0.65    |

|    |    |     |     |    |     |      |      |       |
|----|----|-----|-----|----|-----|------|------|-------|
| 47 | 38 | 211 | 171 | 79 | 183 | 32   | 3.39 | 0.42  |
| 48 | 42 | 268 | 160 | 56 | 188 | 33.4 | 3.85 | 0.4   |
| 49 | 36 | 216 | 167 | 72 | 153 | 21.4 | 3.34 | 0.41  |
| 50 | 45 | 241 | 107 | 39 | 142 | 27.4 | 4.9  | 0.37  |
| 51 | 47 | 216 | 137 | 44 | 185 | 25.2 | 4.3  | 0.43  |
| 52 | 45 | 198 | 126 | 46 | 145 | 32.8 | 2.73 | 0.66  |
| 53 | 30 | 205 | 164 | 75 | 178 | 30.8 | 4.01 | 0.45  |
| 54 | 38 | 249 | 154 | 62 | 156 | 32.6 | 2.79 | 0.65  |
| 55 | 33 | 204 | 163 | 73 | 133 | 25.6 | 2.5  | 0.75  |
| 56 | 60 | 210 | 128 | 84 | 142 | 26.4 | 4.09 | 0.43  |
| 57 | 58 | 225 | 132 | 55 | 138 | 28.8 | 3.61 | 0.46  |
| 58 | 46 | 213 | 144 | 59 | 188 | 31.2 | 3.73 | 0.46  |
| 59 | 57 | 228 | 156 | 61 | 139 | 21.6 | 5.47 | 0.31  |
| 60 | 63 | 230 | 108 | 42 | 174 | 29.6 | 4.86 | 0.28  |
| 61 | 33 | 253 | 148 | 52 | 176 | 27.8 | 5.07 | 0.296 |
| 62 | 25 | 203 | 139 | 40 | 128 | 28   | 5.86 | 0.24  |
| 63 | 52 | 252 | 140 | 43 | 112 | 32.6 | 4.8  | 0.3   |
| 64 | 40 | 226 | 163 | 47 | 140 | 33.8 | 5.07 | 0.29  |
| 65 | 56 | 198 | 169 | 39 | 141 | 30.8 | 4.83 | 0.33  |
| 66 | 33 | 232 | 154 | 48 | 138 | 34.2 | 2.31 | 0.65  |
| 67 | 25 | 211 | 171 | 91 | 183 | 32   | 3.39 | 0.42  |
| 68 | 52 | 268 | 160 | 79 | 188 | 33.4 | 3.85 | 0.4   |
| 69 | 40 | 216 | 167 | 56 | 153 | 21.4 | 3.34 | 0.41  |
| 70 | 56 | 241 | 107 | 72 | 142 | 27.4 | 4.9  | 0.37  |
| 71 | 60 | 249 | 142 | 44 | 185 | 25.2 | 4.3  | 0.43  |
| 72 | 62 | 191 | 179 | 46 | 145 | 32.8 | 2.73 | 0.66  |
| 73 | 43 | 152 | 129 | 75 | 178 | 30.8 | 4.01 | 0.45  |
| 74 | 36 | 230 | 168 | 62 | 156 | 32.6 | 2.79 | 0.65  |
| 75 | 39 | 231 | 180 | 73 | 133 | 25.6 | 2.5  | 0.75  |
| 76 | 34 | 204 | 113 | 84 | 142 | 26.4 | 4.09 | 0.43  |
| 77 | 38 | 253 | 124 | 55 | 138 | 28.8 | 3.61 | 0.46  |
| 78 | 42 | 270 | 121 | 59 | 188 | 31.2 | 3.73 | 0.46  |
| 79 | 36 | 239 | 115 | 61 | 139 | 21.6 | 5.47 | 0.31  |
| 80 | 45 | 235 | 142 | 42 | 174 | 28.4 | 3    | 0.47  |
| 81 | 47 | 216 | 137 | 83 | 118 | 28.4 | 3    | 0.47  |
| 82 | 45 | 198 | 126 | 42 | 105 | 35.8 | 7.95 | 0.18  |
| 83 | 30 | 205 | 164 | 60 | 112 | 25.8 | 2.53 | 0.53  |
| 84 | 33 | 249 | 154 | 54 | 136 | 33.6 | 4.25 | 0.38  |
| 85 | 25 | 204 | 163 | 46 | 112 | 36   | 5.02 | 0.32  |
| 86 | 52 | 210 | 128 | 42 | 111 | 22.6 | 4.85 | 0.3   |
| 87 | 43 | 225 | 132 | 83 | 126 | 24.8 | 3.04 | 0.45  |
| 88 | 54 | 213 | 144 | 34 | 128 | 24.2 | 7.94 | 0.18  |
| 89 | 29 | 228 | 156 | 28 | 130 | 23   | 8.53 | 0.18  |
| 90 | 34 | 230 | 108 | 39 | 132 | 27.4 | 4.9  | 0.37  |
| 91 | 33 | 216 | 142 | 44 | 185 | 25.2 | 4.3  | 0.43  |
| 92 | 25 | 198 | 179 | 46 | 145 | 32.8 | 2.73 | 0.66  |
| 93 | 52 | 205 | 129 | 75 | 178 | 30.8 | 4.01 | 0.45  |
| 94 | 40 | 249 | 168 | 62 | 156 | 32.6 | 2.79 | 0.65  |
| 95 | 56 | 204 | 180 | 73 | 133 | 25.6 | 2.5  | 0.75  |
| 96 | 60 | 210 | 113 | 84 | 142 | 26.4 | 4.09 | 0.43  |

|     |    |     |     |    |     |      |      |       |
|-----|----|-----|-----|----|-----|------|------|-------|
| 97  | 62 | 225 | 124 | 55 | 138 | 28.8 | 3.61 | 0.46  |
| 98  | 43 | 213 | 121 | 59 | 188 | 31.2 | 3.73 | 0.46  |
| 99  | 36 | 228 | 115 | 61 | 139 | 21.6 | 5.47 | 0.31  |
| 100 | 39 | 230 | 142 | 42 | 174 | 28.4 | 3    | 0.47  |
| 101 | 40 | 249 | 137 | 83 | 118 | 35.8 | 7.95 | 0.18  |
| 102 | 46 | 191 | 126 | 42 | 105 | 25.8 | 2.53 | 0.53  |
| 103 | 47 | 152 | 164 | 60 | 112 | 33.6 | 4.25 | 0.38  |
| 104 | 33 | 230 | 154 | 54 | 136 | 36   | 5.02 | 0.32  |
| 105 | 46 | 231 | 163 | 46 | 112 | 22.6 | 4.85 | 0.3   |
| 106 | 38 | 204 | 128 | 42 | 111 | 24.8 | 3.04 | 0.45  |
| 107 | 33 | 253 | 132 | 83 | 126 | 24.2 | 7.94 | 0.18  |
| 108 | 60 | 270 | 144 | 34 | 128 | 23   | 8.53 | 0.18  |
| 109 | 58 | 239 | 156 | 28 | 130 | 28.4 | 6.02 | 0.27  |
| 110 | 46 | 235 | 108 | 39 | 132 | 29.6 | 4.86 | 0.28  |
| 111 | 57 | 253 | 148 | 52 | 176 | 27.8 | 5.07 | 0.296 |
| 112 | 63 | 203 | 139 | 40 | 128 | 28   | 5.86 | 0.24  |
| 113 | 33 | 252 | 140 | 43 | 112 | 32.6 | 4.8  | 0.3   |
| 114 | 34 | 226 | 163 | 47 | 140 | 33.8 | 5.07 | 0.29  |
| 115 | 38 | 198 | 169 | 39 | 141 | 30.8 | 4.83 | 0.33  |
| 116 | 42 | 232 | 154 | 48 | 138 | 34.2 | 2.31 | 0.65  |
| 117 | 36 | 211 | 171 | 91 | 183 | 32   | 3.39 | 0.42  |
| 118 | 45 | 268 | 160 | 79 | 188 | 33.4 | 3.85 | 0.4   |
| 119 | 47 | 216 | 167 | 56 | 153 | 21.4 | 3.34 | 0.41  |
| 120 | 45 | 241 | 107 | 72 | 142 | 28.4 | 6.02 | 0.27  |
| 121 | 30 | 231 | 142 | 39 | 142 | 27.4 | 4.9  | 0.37  |
| 122 | 33 | 204 | 137 | 44 | 118 | 25.2 | 4.3  | 0.43  |
| 123 | 25 | 253 | 126 | 46 | 105 | 32.8 | 2.73 | 0.46  |
| 124 | 52 | 270 | 164 | 75 | 112 | 30.8 | 4.01 | 0.45  |
| 125 | 34 | 239 | 154 | 77 | 136 | 32.6 | 2.79 | 0.5   |
| 126 | 38 | 235 | 176 | 73 | 112 | 25.6 | 2.5  | 0.55  |
| 127 | 42 | 216 | 128 | 84 | 111 | 26.4 | 4.09 | 0.43  |
| 128 | 36 | 198 | 132 | 76 | 126 | 28.8 | 3.61 | 0.46  |
| 129 | 45 | 205 | 144 | 75 | 128 | 31.2 | 3.73 | 0.36  |
| 130 | 56 | 249 | 156 | 61 | 130 | 21.6 | 5.47 | 0.31  |

|      |          |          |          |          |          |          |          |
|------|----------|----------|----------|----------|----------|----------|----------|
| Mean | 224.8308 | 144.8538 | 56.66154 | 141.3538 | 28.89846 | 4.412846 | 0.399262 |
| Stvd | 24.77625 | 20.64732 | 16.83599 | 24.6186  | 4.155374 | 1.551258 | 0.139517 |

| TC:LDL   | TL  |
|----------|-----|
| 1.367568 | 788 |
| 1.4      | 677 |
| 1.41573  | 763 |
| 1.448718 | 742 |
| 1.488722 | 689 |
| 1.633803 | 726 |
| 1.528986 | 761 |
| 1.425532 | 845 |
| 1.553957 | 728 |
| 1.385057 | 744 |
| 1.414773 | 800 |
| 1.492188 | 690 |
| 1.357143 | 603 |
| 1.642857 | 742 |
| 1.638298 | 748 |
| 1.478261 | 647 |
| 1.382514 | 793 |
| 1.43617  | 763 |
| 1.562092 | 685 |
| 1.65493  | 708 |
| 1.830508 | 665 |
| 1.885714 | 625 |
| 1.830357 | 706 |
| 1.830882 | 751 |
| 1.821429 | 702 |
| 1.891892 | 683 |
| 1.785714 | 688 |
| 1.664063 | 694 |
| 1.753846 | 725 |
| 1.742424 | 662 |
| 1.414773 | 800 |
| 1.492188 | 690 |
| 1.357143 | 603 |
| 1.642857 | 742 |
| 1.638298 | 748 |
| 1.478261 | 647 |
| 1.382514 | 793 |
| 1.43617  | 763 |
| 1.562092 | 685 |
| 1.367568 | 788 |
| 1.4      | 677 |
| 1.41573  | 763 |
| 1.448718 | 742 |
| 1.488722 | 689 |
| 1.633803 | 726 |
| 1.528986 | 761 |

|          |     |
|----------|-----|
| 1.425532 | 845 |
| 1.553957 | 728 |
| 1.385057 | 744 |
| 1.830508 | 665 |
| 1.885714 | 625 |
| 1.830357 | 706 |
| 1.830882 | 751 |
| 1.821429 | 702 |
| 1.891892 | 683 |
| 1.785714 | 688 |
| 1.664063 | 694 |
| 1.753846 | 725 |
| 1.742424 | 662 |
| 1.367568 | 788 |
| 1.4      | 677 |
| 1.41573  | 763 |
| 1.448718 | 742 |
| 1.488722 | 689 |
| 1.633803 | 726 |
| 1.528986 | 761 |
| 1.425532 | 845 |
| 1.553957 | 728 |
| 1.385057 | 744 |
| 1.830508 | 665 |
| 1.885714 | 625 |
| 1.830357 | 706 |
| 1.830882 | 751 |
| 1.821429 | 702 |
| 1.891892 | 683 |
| 1.785714 | 688 |
| 1.664063 | 694 |
| 1.753846 | 725 |
| 1.742424 | 662 |
| 1.414773 | 800 |
| 1.414773 | 800 |
| 1.492188 | 690 |
| 1.357143 | 603 |
| 1.642857 | 742 |
| 1.638298 | 748 |
| 1.478261 | 647 |
| 1.382514 | 793 |
| 1.43617  | 763 |
| 1.562092 | 685 |
| 1.830508 | 665 |
| 1.885714 | 625 |
| 1.830357 | 706 |
| 1.830882 | 751 |
| 1.821429 | 702 |
| 1.891892 | 683 |
| 1.785714 | 688 |

|          |     |
|----------|-----|
| 1.664063 | 694 |
| 1.753846 | 725 |
| 1.742424 | 662 |
| 1.414773 | 800 |
| 1.492188 | 690 |
| 1.357143 | 603 |
| 1.642857 | 742 |
| 1.638298 | 748 |
| 1.478261 | 647 |
| 1.382514 | 793 |
| 1.43617  | 763 |
| 1.562092 | 685 |
| 1.65493  | 708 |
| 1.367568 | 788 |
| 1.4      | 677 |
| 1.41573  | 763 |
| 1.448718 | 742 |
| 1.488722 | 689 |
| 1.633803 | 726 |
| 1.528986 | 761 |
| 1.425532 | 845 |
| 1.553957 | 728 |
| 1.385057 | 744 |
| 1.65493  | 708 |
| 1.730508 | 665 |
| 1.885714 | 625 |
| 1.630357 | 706 |
| 1.530882 | 751 |
| 1.821429 | 702 |
| 1.791892 | 763 |
| 1.785714 | 688 |
| 1.664063 | 734 |
| 1.653846 | 725 |
| 1.742424 | 662 |

|          |          |
|----------|----------|
| 1.599794 | 717.5769 |
| 0.174192 | 52.89786 |
