# Supplementary material for: Radiotherapy improves serum fatty acids and lipid profile in breast cancer
Source: PubMed Central journal article supplement (PMC5437547; doi:10.1186/s12944-017-0481-y), 2017-05-18
Supplement: 12944_2017_481_MOESM8_ESM.pdf [file 12944_2017_481_MOESM8_ESM.pdf]

## Post

| No Of Sample | Age | TC  | TG  | HDL | LDL | VLDL | TC:LDL   | TC:HDL |
|--------------|-----|-----|-----|-----|-----|------|----------|--------|
| 1            | 34  | 122 | 130 | 43  | 70  | 26   | 1.742857 | 2.83   |
| 2            | 38  | 142 | 169 | 39  | 79  | 33.8 | 1.797468 | 3.64   |
| 3            | 42  | 158 | 228 | 41  | 118 | 45.6 | 1.338983 | 3.85   |
| 4            | 36  | 126 | 207 | 44  | 86  | 41.4 | 1.465116 | 2.86   |
| 5            | 45  | 120 | 123 | 38  | 67  | 24.6 | 1.791045 | 3.15   |
| 6            | 47  | 189 | 178 | 49  | 127 | 35.6 | 1.488189 | 3.85   |
| 7            | 45  | 152 | 145 | 45  | 96  | 38.2 | 1.583333 | 3.37   |
| 8            | 30  | 158 | 157 | 37  | 85  | 31.4 | 1.858824 | 4.27   |
| 9            | 33  | 139 | 143 | 40  | 85  | 44.2 | 1.635294 | 3.47   |
| 10           | 25  | 169 | 151 | 35  | 76  | 30.2 | 2.223684 | 4.82   |
| 11           | 52  | 121 | 77  | 47  | 49  | 35.4 | 2.469388 | 2.57   |
| 12           | 40  | 103 | 157 | 43  | 58  | 31.4 | 1.775862 | 2.39   |
| 13           | 56  | 136 | 133 | 52  | 84  | 26.6 | 1.619048 | 2.61   |
| 14           | 60  | 174 | 114 | 50  | 112 | 22.8 | 1.553571 | 3.48   |
| 15           | 62  | 195 | 128 | 53  | 159 | 36.4 | 1.226415 | 3.67   |
| 16           | 43  | 169 | 132 | 44  | 148 | 26.4 | 1.141892 | 3.84   |
| 17           | 36  | 143 | 126 | 43  | 76  | 25.2 | 1.881579 | 3.32   |
| 18           | 39  | 135 | 160 | 54  | 89  | 32   | 1.516854 | 2.5    |
| 19           | 40  | 144 | 136 | 36  | 102 | 27.2 | 1.411765 | 4      |
| 20           | 46  | 152 | 125 | 42  | 112 | 25   | 1.357143 | 3.61   |
| 21           | 47  | 164 | 143 | 39  | 62  | 28.4 | 2.645161 | 4.2    |
| 22           | 33  | 180 | 134 | 32  | 57  | 30.6 | 3.157895 | 5.62   |
| 23           | 46  | 170 | 142 | 43  | 84  | 35   | 2.02381  | 3.95   |
| 24           | 38  | 156 | 162 | 47  | 86  | 33.6 | 1.813953 | 3.95   |
| 25           | 33  | 167 | 168 | 41  | 123 | 33.8 | 1.357724 | 4.07   |
| 26           | 60  | 123 | 135 | 38  | 87  | 27   | 1.413793 | 3.23   |
| 27           | 58  | 168 | 148 | 40  | 48  | 29.6 | 3.5      | 4.2    |
| 28           | 46  | 147 | 142 | 45  | 98  | 28.4 | 1.5      | 3.26   |
| 29           | 57  | 155 | 141 | 50  | 93  | 28.2 | 1.666667 | 3.1    |
| 30           | 63  | 130 | 154 | 51  | 79  | 30.8 | 1.64557  | 2.54   |
| 31           | 33  | 121 | 77  | 47  | 70  | 26   | 1.742857 | 2.83   |
| 32           | 25  | 103 | 157 | 43  | 79  | 33.8 | 1.797468 | 3.64   |
| 33           | 52  | 136 | 133 | 52  | 118 | 45.6 | 1.338983 | 3.85   |
| 34           | 40  | 174 | 114 | 50  | 86  | 41.4 | 1.465116 | 2.86   |
| 35           | 56  | 195 | 128 | 53  | 67  | 24.6 | 1.791045 | 3.15   |
| 36           | 60  | 169 | 132 | 44  | 127 | 35.6 | 1.488189 | 3.85   |
| 37           | 62  | 143 | 126 | 43  | 96  | 38.2 | 1.583333 | 3.37   |
| 38           | 43  | 135 | 160 | 54  | 85  | 31.4 | 1.858824 | 4.27   |
| 39           | 36  | 144 | 136 | 36  | 85  | 44.2 | 1.635294 | 3.47   |
| 40           | 39  | 152 | 125 | 42  | 76  | 30.2 | 2.223684 | 4.82   |
| 41           | 40  | 122 | 130 | 43  | 62  | 28.4 | 2.645161 | 4.2    |
| 42           | 46  | 142 | 169 | 39  | 57  | 30.6 | 3.157895 | 5.62   |
| 43           | 47  | 158 | 228 | 41  | 84  | 35   | 2.02381  | 3.95   |
| 44           | 33  | 126 | 207 | 44  | 86  | 33.6 | 1.813953 | 3.95   |
| 45           | 46  | 120 | 123 | 38  | 123 | 33.8 | 1.357724 | 4.07   |
| 46           | 34  | 189 | 178 | 49  | 87  | 27   | 1.413793 | 3.23   |
| 47           | 38  | 152 | 145 | 45  | 48  | 29.6 | 3.5      | 4.2    |

|    |    |     |     |    |     |      |          |      |
|----|----|-----|-----|----|-----|------|----------|------|
| 48 | 42 | 158 | 157 | 37 | 98  | 28.4 | 1.5      | 3.26 |
| 49 | 36 | 139 | 143 | 40 | 93  | 28.2 | 1.666667 | 3.1  |
| 50 | 45 | 169 | 151 | 35 | 79  | 30.8 | 1.64557  | 2.54 |
| 51 | 47 | 164 | 143 | 39 | 49  | 35.4 | 2.469388 | 2.57 |
| 52 | 45 | 180 | 134 | 32 | 58  | 31.4 | 1.775862 | 2.39 |
| 53 | 30 | 170 | 142 | 43 | 84  | 26.6 | 1.619048 | 2.61 |
| 54 | 38 | 156 | 162 | 47 | 112 | 22.8 | 1.553571 | 3.48 |
| 55 | 33 | 167 | 168 | 41 | 159 | 36.4 | 1.226415 | 3.67 |
| 56 | 60 | 123 | 135 | 38 | 148 | 26.4 | 1.141892 | 3.84 |
| 57 | 58 | 168 | 148 | 40 | 76  | 25.2 | 1.881579 | 3.32 |
| 58 | 46 | 147 | 142 | 45 | 89  | 32   | 1.516854 | 2.5  |
| 59 | 57 | 155 | 141 | 50 | 102 | 27.2 | 1.411765 | 4    |
| 60 | 63 | 130 | 154 | 51 | 112 | 25   | 1.357143 | 3.61 |
| 61 | 33 | 122 | 130 | 43 | 62  | 28.4 | 2.645161 | 4.2  |
| 62 | 25 | 142 | 169 | 39 | 57  | 30.6 | 3.157895 | 5.62 |
| 63 | 52 | 158 | 228 | 41 | 84  | 35   | 2.02381  | 3.95 |
| 64 | 40 | 126 | 207 | 44 | 86  | 33.6 | 1.813953 | 3.95 |
| 65 | 56 | 120 | 123 | 38 | 123 | 33.8 | 1.357724 | 4.07 |
| 66 | 33 | 189 | 178 | 49 | 87  | 27   | 1.413793 | 3.23 |
| 67 | 25 | 152 | 145 | 45 | 48  | 29.6 | 3.5      | 4.2  |
| 68 | 52 | 158 | 157 | 37 | 98  | 28.4 | 1.5      | 3.26 |
| 69 | 40 | 139 | 143 | 40 | 93  | 28.2 | 1.666667 | 3.1  |
| 70 | 56 | 169 | 151 | 35 | 79  | 30.8 | 1.64557  | 2.54 |
| 71 | 60 | 164 | 143 | 39 | 49  | 35.4 | 2.469388 | 2.57 |
| 72 | 62 | 180 | 134 | 32 | 58  | 31.4 | 1.775862 | 2.39 |
| 73 | 43 | 170 | 142 | 43 | 84  | 26.6 | 1.619048 | 2.61 |
| 74 | 36 | 156 | 162 | 47 | 112 | 22.8 | 1.553571 | 3.48 |
| 75 | 39 | 167 | 168 | 41 | 159 | 36.4 | 1.226415 | 3.67 |
| 76 | 34 | 123 | 135 | 38 | 148 | 26.4 | 1.141892 | 3.84 |
| 77 | 38 | 168 | 148 | 40 | 76  | 25.2 | 1.881579 | 3.32 |
| 78 | 42 | 147 | 142 | 45 | 89  | 32   | 1.516854 | 2.5  |
| 79 | 36 | 155 | 141 | 50 | 102 | 27.2 | 1.411765 | 4    |
| 80 | 45 | 130 | 154 | 51 | 112 | 25   | 1.357143 | 3.61 |
| 81 | 47 | 121 | 77  | 47 | 70  | 26   | 1.742857 | 2.83 |
| 82 | 45 | 103 | 157 | 43 | 79  | 33.8 | 1.797468 | 3.64 |
| 83 | 30 | 136 | 133 | 52 | 118 | 45.6 | 1.338983 | 3.85 |
| 84 | 33 | 174 | 114 | 50 | 86  | 41.4 | 1.465116 | 2.86 |
| 85 | 25 | 195 | 128 | 53 | 67  | 24.6 | 1.791045 | 3.15 |
| 86 | 52 | 169 | 132 | 44 | 127 | 35.6 | 1.488189 | 3.85 |
| 87 | 43 | 143 | 126 | 43 | 96  | 38.2 | 1.583333 | 3.37 |
| 88 | 54 | 135 | 160 | 54 | 85  | 31.4 | 1.858824 | 4.27 |
| 89 | 29 | 144 | 136 | 36 | 85  | 44.2 | 1.635294 | 3.47 |
| 90 | 34 | 152 | 125 | 42 | 76  | 30.2 | 2.223684 | 4.82 |
| 91 | 33 | 164 | 143 | 39 | 49  | 35.4 | 2.469388 | 2.57 |
| 92 | 25 | 180 | 134 | 32 | 58  | 31.4 | 1.775862 | 2.39 |
| 93 | 52 | 170 | 142 | 43 | 84  | 26.6 | 1.619048 | 2.61 |
| 94 | 40 | 156 | 162 | 47 | 112 | 22.8 | 1.553571 | 3.48 |
| 95 | 56 | 167 | 168 | 41 | 159 | 36.4 | 1.226415 | 3.67 |
| 96 | 60 | 123 | 135 | 38 | 148 | 26.4 | 1.141892 | 3.84 |
| 97 | 62 | 168 | 148 | 40 | 76  | 25.2 | 1.881579 | 3.32 |

|     |    |     |     |    |     |      |          |      |
|-----|----|-----|-----|----|-----|------|----------|------|
| 98  | 43 | 147 | 142 | 45 | 89  | 32   | 1.516854 | 2.5  |
| 99  | 36 | 155 | 141 | 50 | 102 | 27.2 | 1.411765 | 4    |
| 100 | 39 | 130 | 154 | 51 | 112 | 25   | 1.357143 | 3.61 |
| 101 | 40 | 121 | 77  | 47 | 70  | 26   | 1.742857 | 2.83 |
| 102 | 46 | 103 | 157 | 43 | 79  | 33.8 | 1.797468 | 3.64 |
| 103 | 47 | 136 | 133 | 52 | 118 | 45.6 | 1.338983 | 3.85 |
| 104 | 33 | 174 | 114 | 50 | 86  | 41.4 | 1.465116 | 2.86 |
| 105 | 46 | 195 | 128 | 53 | 67  | 24.6 | 1.791045 | 3.15 |
| 106 | 38 | 169 | 132 | 44 | 127 | 35.6 | 1.488189 | 3.85 |
| 107 | 33 | 143 | 126 | 43 | 96  | 38.2 | 1.583333 | 3.37 |
| 108 | 60 | 135 | 160 | 54 | 85  | 31.4 | 1.858824 | 4.27 |
| 109 | 58 | 144 | 136 | 36 | 85  | 44.2 | 1.635294 | 3.47 |
| 110 | 46 | 152 | 125 | 42 | 76  | 30.2 | 2.223684 | 4.82 |
| 111 | 57 | 122 | 130 | 43 | 62  | 28.4 | 2.645161 | 4.2  |
| 112 | 63 | 142 | 169 | 39 | 57  | 30.6 | 3.157895 | 5.62 |
| 113 | 33 | 158 | 228 | 41 | 84  | 35   | 2.02381  | 3.95 |
| 114 | 34 | 126 | 207 | 44 | 86  | 33.6 | 1.813953 | 3.95 |
| 115 | 38 | 120 | 123 | 38 | 123 | 33.8 | 1.357724 | 4.07 |
| 116 | 42 | 189 | 178 | 49 | 87  | 27   | 1.413793 | 3.23 |
| 117 | 36 | 152 | 145 | 45 | 48  | 29.6 | 3.5      | 4.2  |
| 118 | 45 | 158 | 157 | 37 | 98  | 28.4 | 1.5      | 3.26 |
| 119 | 47 | 139 | 143 | 40 | 93  | 28.2 | 1.666667 | 3.1  |
| 120 | 45 | 169 | 151 | 35 | 79  | 30.8 | 1.64557  | 2.54 |
| 121 | 30 | 152 | 125 | 42 | 148 | 26.4 | 1.141892 | 3.84 |
| 122 | 33 | 164 | 143 | 39 | 76  | 25.2 | 1.881579 | 3.32 |
| 123 | 25 | 180 | 134 | 32 | 89  | 32   | 1.516854 | 2.5  |
| 124 | 52 | 170 | 142 | 43 | 102 | 27.2 | 1.411765 | 4    |
| 125 | 34 | 156 | 162 | 47 | 112 | 25   | 1.357143 | 3.61 |
| 126 | 38 | 167 | 168 | 41 | 62  | 28.4 | 2.645161 | 4.2  |
| 127 | 42 | 123 | 135 | 38 | 57  | 30.6 | 3.157895 | 5.62 |
| 128 | 36 | 168 | 148 | 40 | 84  | 35   | 2.02381  | 3.95 |
| 129 | 45 | 147 | 142 | 45 | 86  | 33.6 | 1.813953 | 3.95 |
| 130 | 56 | 155 | 141 | 50 | 123 | 33.8 | 1.357724 | 4.07 |

|       |          |          |          |          |          |          |          |
|-------|----------|----------|----------|----------|----------|----------|----------|
| Mean  | 150.2333 | 146.2667 | 43.36667 | 89.83333 | 31.49333 | 1.786763 | 3.540667 |
| Stdev | 22.19612 | 27.42253 | 5.623125 | 26.6886  | 5.715975 | 0.53787  | 0.726209 |

| HDL:LDL | TL  |
|---------|-----|
| 0.61    | 515 |
| 0.49    | 579 |
| 0.34    | 695 |
| 0.51    | 613 |
| 0.56    | 498 |
| 0.38    | 693 |
| 0.46    | 588 |
| 0.45    | 587 |
| 0.47    | 557 |
| 0.46    | 581 |
| 0.95    | 444 |
| 0.74    | 511 |
| 0.61    | 555 |
| 0.44    | 600 |
| 0.33    | 685 |
| 0.29    | 643 |
| 0.56    | 538 |
| 0.6     | 588 |
| 0.35    | 568 |
| 0.37    | 581 |
| 0.62    | 558 |
| 0.56    | 553 |
| 0.51    | 589 |
| 0.54    | 601 |
| 0.33    | 649 |
| 0.43    | 533 |
| 0.83    | 554 |
| 0.45    | 582 |
| 0.53    | 589 |
| 0.64    | 564 |
| 0.61    | 515 |
| 0.49    | 579 |
| 0.34    | 695 |
| 0.51    | 613 |
| 0.56    | 498 |
| 0.38    | 693 |
| 0.46    | 588 |
| 0.45    | 587 |
| 0.47    | 557 |
| 0.46    | 581 |
| 0.62    | 558 |
| 0.56    | 553 |
| 0.51    | 589 |
| 0.54    | 601 |
| 0.33    | 649 |
| 0.43    | 533 |
| 0.83    | 554 |

|      |     |
|------|-----|
| 0.45 | 582 |
| 0.53 | 589 |
| 0.64 | 564 |
| 0.95 | 444 |
| 0.74 | 511 |
| 0.61 | 555 |
| 0.44 | 600 |
| 0.33 | 685 |
| 0.29 | 643 |
| 0.56 | 538 |
| 0.6  | 588 |
| 0.35 | 568 |
| 0.37 | 581 |
| 0.62 | 558 |
| 0.56 | 553 |
| 0.51 | 589 |
| 0.54 | 601 |
| 0.33 | 649 |
| 0.43 | 533 |
| 0.83 | 554 |
| 0.45 | 582 |
| 0.53 | 589 |
| 0.64 | 564 |
| 0.95 | 444 |
| 0.74 | 511 |
| 0.61 | 555 |
| 0.44 | 600 |
| 0.33 | 685 |
| 0.29 | 643 |
| 0.56 | 538 |
| 0.6  | 588 |
| 0.35 | 568 |
| 0.37 | 581 |
| 0.61 | 515 |
| 0.49 | 579 |
| 0.34 | 695 |
| 0.51 | 613 |
| 0.56 | 498 |
| 0.38 | 693 |
| 0.46 | 588 |
| 0.45 | 587 |
| 0.47 | 557 |
| 0.46 | 581 |
| 0.95 | 444 |
| 0.74 | 511 |
| 0.61 | 555 |
| 0.44 | 600 |
| 0.33 | 685 |
| 0.29 | 643 |
| 0.56 | 538 |

|      |     |
|------|-----|
| 0.6  | 588 |
| 0.35 | 568 |
| 0.37 | 581 |
| 0.61 | 515 |
| 0.49 | 579 |
| 0.34 | 695 |
| 0.51 | 613 |
| 0.56 | 498 |
| 0.38 | 693 |
| 0.46 | 588 |
| 0.45 | 587 |
| 0.47 | 557 |
| 0.46 | 581 |
| 0.62 | 558 |
| 0.56 | 553 |
| 0.51 | 589 |
| 0.54 | 601 |
| 0.33 | 649 |
| 0.43 | 533 |
| 0.83 | 554 |
| 0.45 | 582 |
| 0.53 | 589 |
| 0.64 | 564 |
| 0.29 | 643 |
| 0.56 | 538 |
| 0.6  | 588 |
| 0.35 | 568 |
| 0.37 | 581 |
| 0.62 | 558 |
| 0.56 | 553 |
| 0.51 | 589 |
| 0.54 | 601 |
| 0.33 | 649 |

0.513667 579.7

0.149031 55.59841
