# Supplementary material for: Radiotherapy improves serum fatty acids and lipid profile in breast cancer
Source: PubMed Central journal article supplement (PMC5437547; doi:10.1186/s12944-017-0481-y), 2017-05-18
Supplement: 12944_2017_481_MOESM10_ESM.pdf [file 12944_2017_481_MOESM10_ESM.pdf]

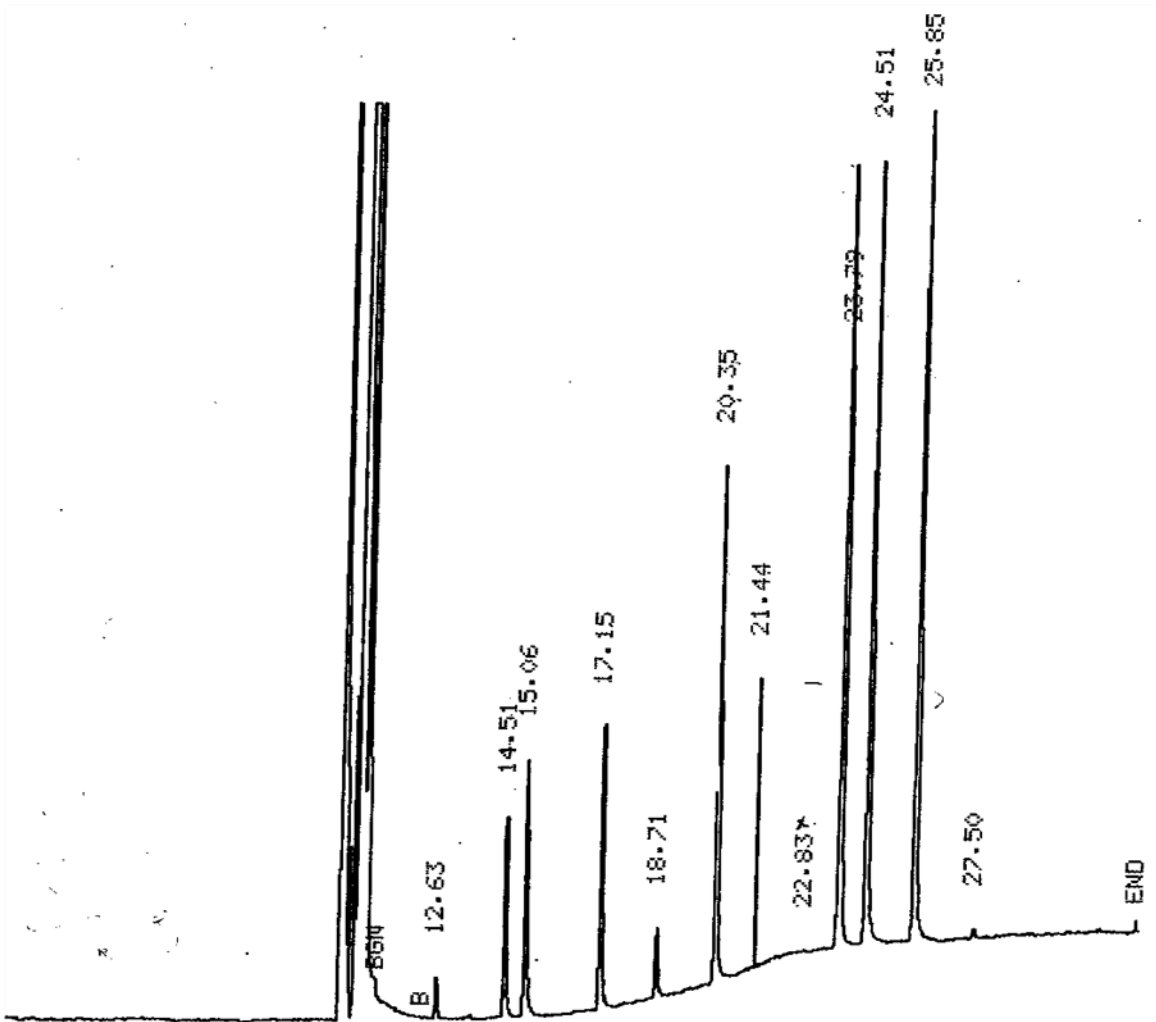

GC-FID chromatogram showing total serum fatty acid profile of Pre-treated BC patients

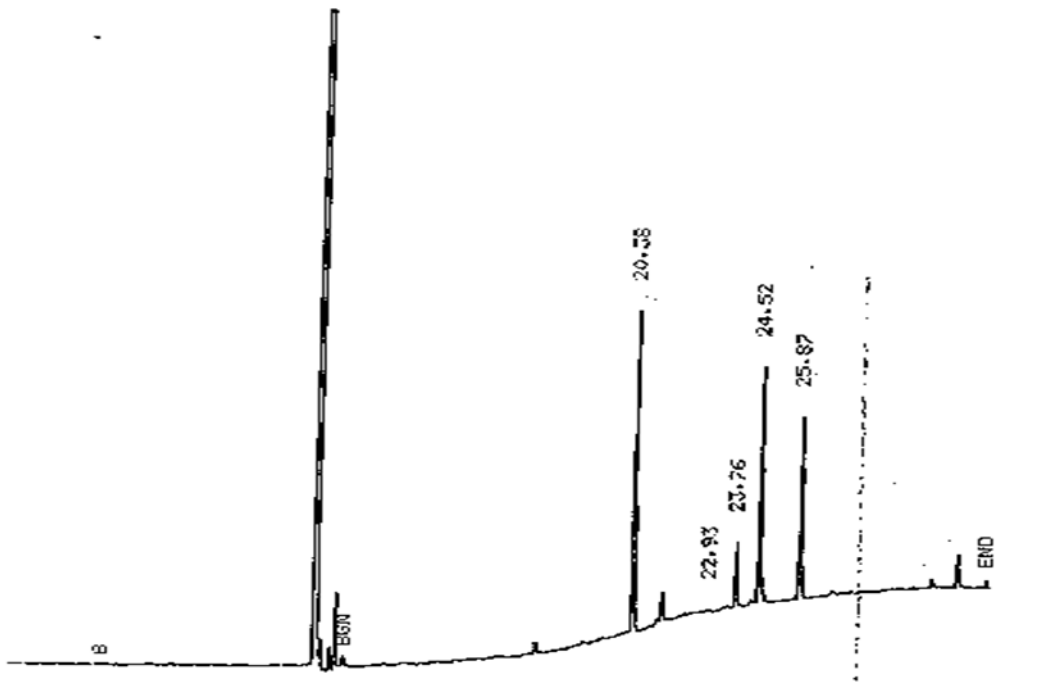

GC-FID chromatogram showing free serum fatty acid profile of Pre- treated BC patients

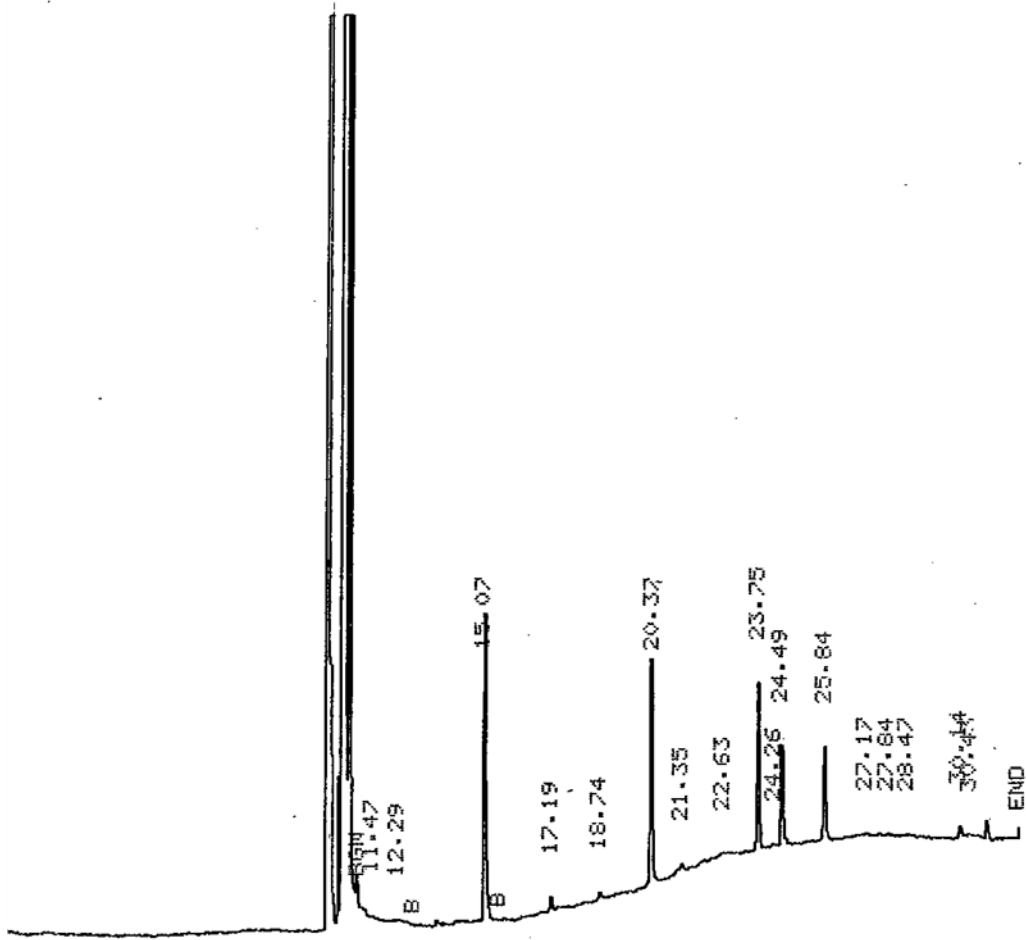

GC-FID chromatogram showing total serum fatty acid profile of Post treated BC patients

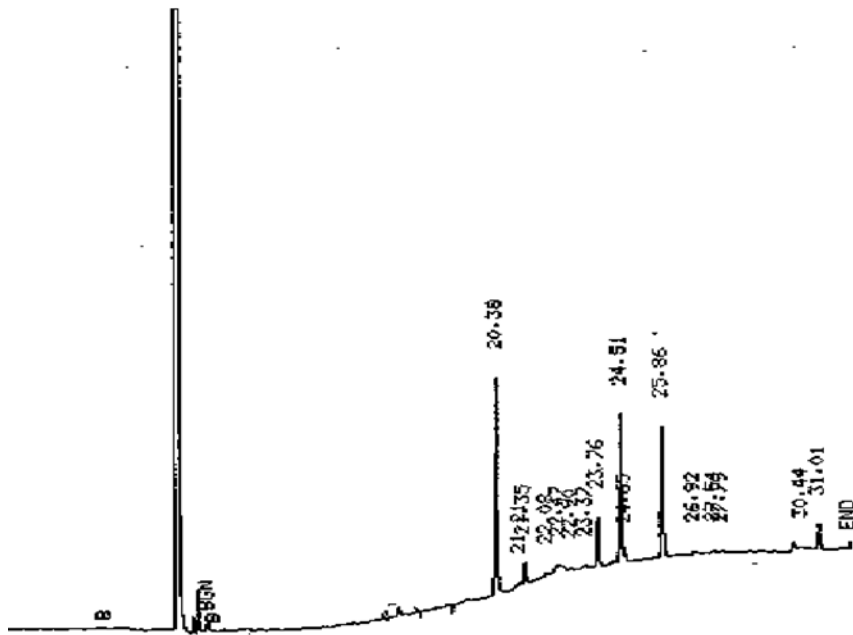

GC-FID chromatogram showing free serum fatty acid profile of Post-treated BC patients

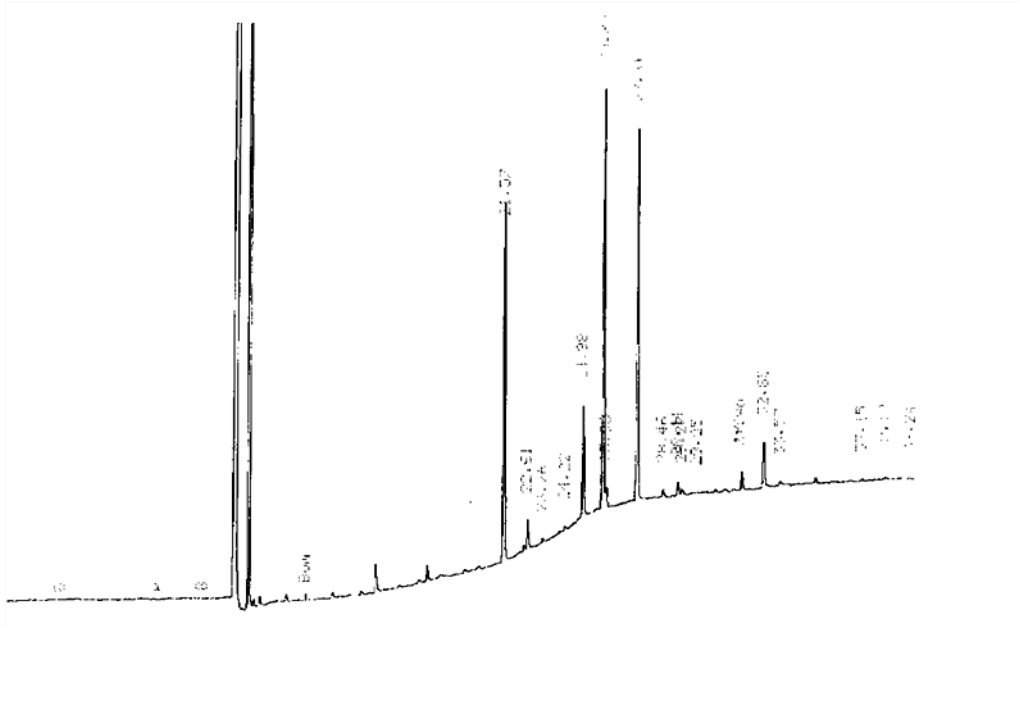

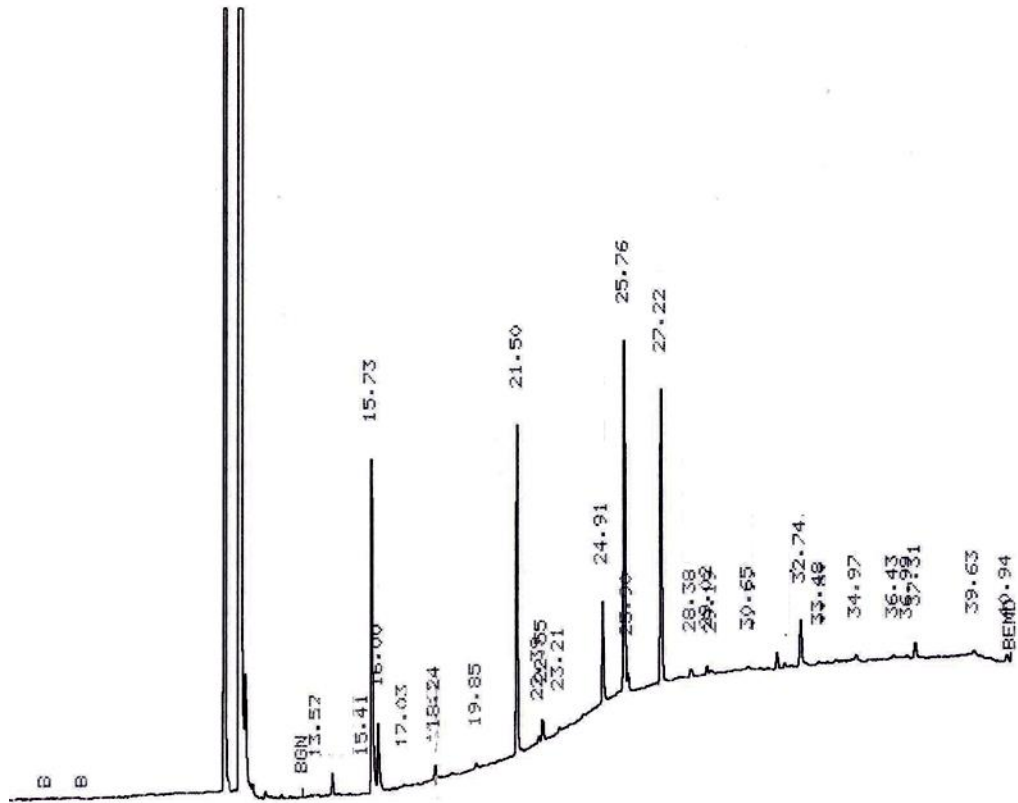

GC-FID chromatogram showing total serum fatty acid profile of control
